# A Neuromuscular Model of Human Locomotion Combines Spinal Reflex Circuits with Voluntary Movements

Rachid Ramadan, Hartmut Geyer, John J. Jeka, Gregor Schöner, Hendrik Reimann

September 26, 2021

## Abstract

Existing models of human walking use low-level reflexes or neural oscillators to generate movement. While appropriate to generate the stable, rhythmic movement patterns of steady-state walking, these models lack the ability to change their movement patterns or spontaneously generate new movements in the specific, goal-directed way characteristic of voluntary movements. Here we present a neuromuscular model of human locomotion that bridges this gap and combines the ability to execute goal directed movements with the generation of stable, rhythmic movement patterns that are required for robust locomotion. The model represents goals for voluntary movements of the swing leg on the task level of swing leg joint kinematics. Smooth movements plans towards the goal configuration are generated on the task level and transformed into descending motor commands that execute the planned movements, using internal models. The movement goals and plans are updated in real time based on sensory feedback and task constraints. On the spinal level, the descending commands during the swing phase are integrated with a generic stretch reflex for each muscle. Stance leg control solely relies on dedicated spinal reflex pathways. Spinal reflexes stimulate Hill-type muscles that actuate a biomechanical model with eight internal joints and six free-body degrees of freedom. The model is able to generate voluntary, goal-directed reaching movements with the swing leg and combine multiple movements in a rhythmic sequence. During walking, the swing leg is moved in a goal-directed manner to a target that is updated in real-time based on sensory feedback to maintain upright balance, while the stance leg is stabilized by low-level reflexes and a behavioral organization switching between swing and stance control for each leg. With this combination of reflexive stance leg and voluntary, goal-directed control of the swing leg, the model controller generates rhythmic, stable walking patterns in which the swing leg movement can be flexibly updated in real-time to step over or around obstacles.

## 1 Introduction

Walking is one of the most common movements humans perform every day. Walking consists of putting one foot in front of the other while moving the body forward. Most of the time walking does not require attention. But when walking in complex terrain, we are able to precisely step to suitable locations. When someone bumps into us, we are able to modify our normal movement pattern to maintain upright balance. In these situations, we are able to quickly and smoothly transition to conscious control of the usually largely reflexive walking movement. The motor control of walking as a movement that is usually habitual and reflexive, sometimes voluntary and goal-directed, and often somewhere in-between is currently not well understood. In this paper, we present a neuromechanical model for generating walking movements that is capable of covering the whole range of walking movements between these two poles.

### 1.1 Human Walking as a Voluntary Movement

Human movement shows amazing flexibility. We can perform a wide variety of tasks that require different movement patterns and coordination between body parts. Meaningful tasks usually require us to move a body part or tool to a goal position, such as the finger to a button or a screwdriver to a screw. Many tasks also contain additional requirements for timing or force, e.g. catching a ball in the air or hitting a nail with a hammer. The human nervous system routinely solves complex movements tasks in situations that it never

43 specifically encountered before, using sensory information to generate a movement plan and update it during  
44 execution.

45 Humans are able to flexibly modify the basic pattern of their gait cycle during walking (Steele et al., 2012;  
46 Ackermann and van den Bogert, 2012). At a high level, a walking movement pattern can be quantified by  
47 variables like speed and heading direction, and the length, width, duration and frequency of steps, typically  
48 referred to as gait parameters (Levine et al., 2012). Humans can generally choose these parameters as  
49 desired. They can change direction, walk fast or slow, with narrow or wide steps and a slow or fast pace,  
50 etc. (Inman et al., 1981). In addition to this high-level flexibility of gait patterns, humans are also able to  
51 choose how exactly they perform each low-level limb movement. Stepping to a fixed location in a fixed time  
52 can be performed with a variety of trajectories for the swing foot. We can swing the foot higher to step  
53 over an obstacle, or closer to the stance leg to step around an object. We can also choose to walk with bent  
54 knees, with the foot rotated in or out, or tip-toe by limiting ground contact to the balls of the foot and keep  
55 the heels up.

## 56 1.2 Stability and Upright Balance

57 One aspect of moving a body part to a target is the ability to confine movement to only the desired body  
58 part, while keeping the rest of the body stable and un-moving. Pushing a button requires not only muscles  
59 along the arm and shoulder to move the finger to the button, but also muscles along the trunk and legs to  
60 stabilize the rest of the body, so that the contact force at the finger results in moving the button in rather  
61 than the body away (Woollacott et al., 1984). Muscle activation measurements reveal that when initiating  
62 such a manipulation movement while standing, muscles along the legs and trunk that stabilize the body  
63 activate earlier than muscles along the shoulder and arms that move the arm (Aruin et al., 1998). Stability  
64 is an integral part of the motor system that is integrated into the movement plan at all stages (Bouisset and  
65 Zattara, 1987).

66 Stability is especially important for the upright body as a whole. When the body is upright during  
67 standing or walking, failure to stabilize it properly can lead to a fall, resulting in impact with the ground  
68 and serious injury. Yet for walking, “not moving” is not an option. We cannot keep parts of the body static  
69 relative to the environment, because locomotion of the whole body to a different place is the functional goal.  
70 The task for the nervous system is to generate a stable movement pattern for the whole body, transporting  
71 it with a relatively constant velocity from one point to another, while keeping movements in other directions  
72 to a minimum. To solve the main task of locomotion, the legs need to generate forces against the ground,  
73 initially to accelerate the body in the direction of travel and reach a steady state of motion, then to regulate  
74 the body movement around the steady state movement pattern and correct deviations from it. To prevent  
75 falls, the legs need to generate vertical forces that keep the body mass at a certain height, and also horizontal  
76 forces that regulate the body movement in the direction orthogonal to the direction of travel. Both of these  
77 requirements need to be combined into a cyclical pattern of moving one leg ahead in a step while supporting  
78 the body weight with the other one, then shifting weight and the role of the legs.

## 79 1.3 Habitual Control

80 Despite the flexibility to choose from a large range of walking patterns and movements, normal human  
81 walking is usually highly repetitive, with few variations. Humans will generally choose a walking pattern  
82 and then adhere to it for longer stretches of time, with gait parameters relatively stable on a time scale of  
83 minutes (Dean, 1965). One factor driving this long-term stability of walking patterns is energy efficiency.  
84 The “cost of transport” of using metabolic energy to move from one place to another depends on the walking  
85 speed, with large cost at high and low speeds, and lower cost at medium speeds (Ralston, 1958). Humans  
86 usually choose to walk near the speed where this metabolic cost of transport is minimal (Ralston, 1958;  
87 Browning et al., 2006; Summerside et al., 2018). A second factor affecting the choice of gait pattern is  
88 balance (Bauby and Kuo, 2000; Reimann et al., 2018a). Walking with increased step width increases the  
89 base of support during double stance, so the body is passively more stable (Donelan et al., 2004). But  
90 higher step width also leads to larger average displacement between the body center of mass and the stance  
91 foot during single stance, increasing the lever arm of the gravitational force pulling the body down, and  
92 thus the muscle forces required to counter gravity and keep us upright. Higher muscle forces require more

93 metabolic energy, so there is a trade-off between balance and metabolic cost, where gait patterns that are  
94 more stable are also less efficient Donelan et al. (2001). Balance is also actively maintained by changing  
95 the foot placement relative to the average gait pattern based on the current state of the body in space  
96 (Wang and Srinivasan, 2014; Bruijn and van Dieën, 2018; Reimann et al., 2018b). This active control of foot  
97 placement aggregates high-level sensory information about the body in space from the visual and vestibular  
98 and proprioceptive systems (Peterka, 2002) and maps it to changes in foot placement. This mode of control  
99 is neither reflexive in the narrow sense nor voluntary or conscious, but similar to online updating to a new  
100 target during a reaching movement (Scott, 2004).

101 The choice of gait pattern is different across different groups of people. Older people tend to walk more  
102 slowly (Osoba et al., 2019; Reimann et al., 2020; Pijnappels et al., 2008). People with Parkinson’s Disease  
103 tend to take short, shuffling steps (Jankovic, 2008). People with Cerebral Palsy often swing their legs out  
104 to the side much more than typical (Sutherland and Davids, 1993). While there are reasonable explanations  
105 for some of these gait pattern changes, the underlying causes are often not well understood. One reason for  
106 this limited understanding is the complexity of the problem. Walking is a biomechanically complex motor  
107 pattern with many moving parts (Nielsen, 2003). The concrete choice of motor pattern depends on many  
108 different factors, including metabolic energy cost, avoiding muscle fatigue, stability and control of upright  
109 balance, and external constraints such as obstacles and the condition of the walking surface (Kirtley et al.,  
110 1985; Prentice et al., 2004; Voloshina et al., 2013; Hunter et al., 2010; Matthis and Fajen, 2014; Summerside  
111 et al., 2018; Kung et al., 2018). While motor control of walking is largely sub-conscious, cognitive processes  
112 also play a role, and secondary tasks during walking have routinely been shown to affect gait parameters  
113 and balance control (Matthis and Fajen, 2014).

#### 114 1.4 Modeling Walking Control

115 To understand the interactions between different factors that drive the choice of walking movement pattern,  
116 we need a computational model that includes all factors of interest (Allen and Ting, 2016; De Groote and  
117 Falisse, 2021). Such a model allows us to manipulate individual factors and observe the resulting changes in  
118 the walking pattern directly in simulation studies (Reimann et al., 2020). Existing neuromechanical models  
119 of walking largely focus on the generation of rhythmic movement patterns and balance control. The rhythmic  
120 movement patterns are either generated by neural oscillators (Taga, 1995a; Van der Noot et al., 2018) or by  
121 a finite state machine switching between different movement states depending on ground contact (Günther  
122 and Ruder, 2003; Geyer and Herr, 2010). These existing models have some degree of flexibility. Some models  
123 can walk at different speeds (Taga, 1995b; Song and Geyer, 2015; Van der Noot et al., 2018), change direction  
124 (Van der Noot et al., 2018), and step over obstacles (Taga, 1998; Song and Geyer, 2015). This can be achieved  
125 by re-parameterizing a model, essentially optimizing a large number of neuromechanical parameters to walk  
126 at a range of different speeds, and then switching between these parameter sets, or interpolating between  
127 them, to change speed during walking (Song and Geyer, 2015; Van der Noot et al., 2018; Di Russo et al.,  
128 2021). Another approach is to modulate the central neural drive of a model to oscillate faster (Taga, 1995b;  
129 Van der Noot et al., 2018). Similar techniques can be used to step over obstacles, either increasing the  
130 gain between the central oscillator and the flexor muscles of the swing leg hip and knee (Taga, 1998), or  
131 the target flexion angle for a reflex at the same joints, with similar effect (Song and Geyer, 2015). These  
132 approaches generally provide solutions for one specific problem, e.g. walking at different speeds or stepping  
133 over an obstacle, but do not generalize directly to related problems, such as walking at different cadences  
134 or stepping around an obstacle, rather than over it. Humans, in contrast, are not only capable of flexibly  
135 modulating gait parameters or the path of the swing foot, but can spontaneously walk in novel patterns,  
136 which they never used or observed before.

137 Our goal is to develop a neuromechanical model of walking that shows a similar degree of flexibility as  
138 humans, in that it can generate any desired walking pattern. We postulate that the key limitation of current  
139 walking models is that they are almost completely spinal, and lack cortical motor planning and control.  
140 These high-level features are usually studied as part of upper extremity reaching movements (Kalaska et al.,  
141 1997; Sabes, 2000; d’Avella and Lacquaniti, 2013). Some researchers have pointed out the duality of steps as  
142 (i) part of a cyclical movement pattern of the whole body for locomotion and (ii) a reaching movement with  
143 the foot (Reynolds and Day, 2005b,a; Smid and den Otter, 2013; Mowbray et al., 2019; Barton et al., 2019).  
144 Experimental evidence indicates that stepping movements during walking are generated rhythmically using

145 low-level, reflexive structures (Mutha, 2017; Ivanenko et al., 2006; Zehr and Stein, 1999; Stein, 1991). On  
146 the other hand, these movements can be precisely and efficiently modulated by high-level influences when  
147 desired, e.g. to step to a specific target or around an obstacle (Zhang et al., 2020).

148 Here we present a model extension that attempts to bridge this gap between existing neuromechanical  
149 models of walking and the ability to plan and execute voluntary movements with the leg. The key innovation  
150 in our model is an explicit movement plan for the swing leg on task level. The high-level movement plan  
151 is executed by transforming the planned movements into descending commands that integrate with the  
152 low-level, reflexive control architecture of the spinal cord, using internal models to account for dynamic  
153 interaction forces and properties of the muscles and spinal reflexes. For the stance leg, we use an existing  
154 solution of dedicated spinal reflex modules that generate the appropriate muscle activation with minimal  
155 high-level input (Song and Geyer, 2015). We show that this model is able to generate voluntary swing leg  
156 movements, and to integrate these swing leg movements into a rhythmic walking pattern, modulated by  
157 high-level feedback to maintain upright balance.

## 158 2 Methods

159 The model spans multiple levels, across high-level movement planning and coordination, spinal reflex arcs,  
160 muscle physiology and skeletal biomechanics. Figure 1 provides an overview. A finite state machine organizes  
161 the model and switches between swing and stance phase control for each leg. In the supraspinal layer, a  
162 volition module represents task-level movement goals, a planning module generates motor plans to reach  
163 the goal state and a balance module updates the movement plan based on real-time sensory feedback about  
164 the body in space. An internal model then transforms the high-level motor plan into descending motor  
165 commands that interface with the spinal cord to execute the planned movement. In the spinal cord, the  
166 swing leg is controlled by a generic stretch reflex that is modulated by the descending commands, while  
167 the stance leg control is purely reflexive. Reflexes stimulate Hill-type muscles that actuate a biomechanical  
168 model.

169 The key innovation here is the integration of the volition module in the supraspinal layer that prescribes  
170 movement goals with the other components. While the volition module itself is relatively simple, the main  
171 challenge in the development of this model was to integrate the task-level movement goals with the low-level  
172 spinal reflex control modules so that the resulting system can combine stable, repetitive walking movements  
173 with voluntary, goal-directed movements that solve tasks represented in the volition module. The finite state  
174 machine, balance control, spinal reflexes, muscle model and biomechanics are all modeled with standard  
175 solutions from textbooks or the literature. Each module is described in detail below.

### 176 2.1 High-level Control

#### 177 2.1.1 Behavioral organization

178 Walking requires the sequential execution of different movements for each limb, organized in a cyclical pattern  
179 (Moissenet et al., 2019; Fukuchi et al., 2018). We organize the model behavior in three phases per leg, (1)  
180 early swing, (2) late swing and (3) stance. A finite state machine generates transitions between these phases  
181 based on sensory information of ground contact and internal timing. The early swing phase is initiated by  
182 the detection of ground contact of the contralateral leg ( $3 \rightarrow 1$ ). Transition to the late swing phase occurs  
183 after a fixed time of 0.3 s ( $1 \rightarrow 2$ ). The late swing phase lasts until ground contact is detected, leading to a  
184 transition to the stance phase ( $2 \rightarrow 3$ ). This system is functionally equivalent to one with four global states  
185 of early swing and late swing for each leg, used, e.g. by Yin et al. (2007), since ground contact detection  
186 of the swing leg triggers transitions. During swing, the leg is controlled in a goal-directed way based on a  
187 movement plan (see Section 2.1.4 below). During stance, the leg is controlled in a purely reflexive way (see  
188 Section 2.2.2 below).

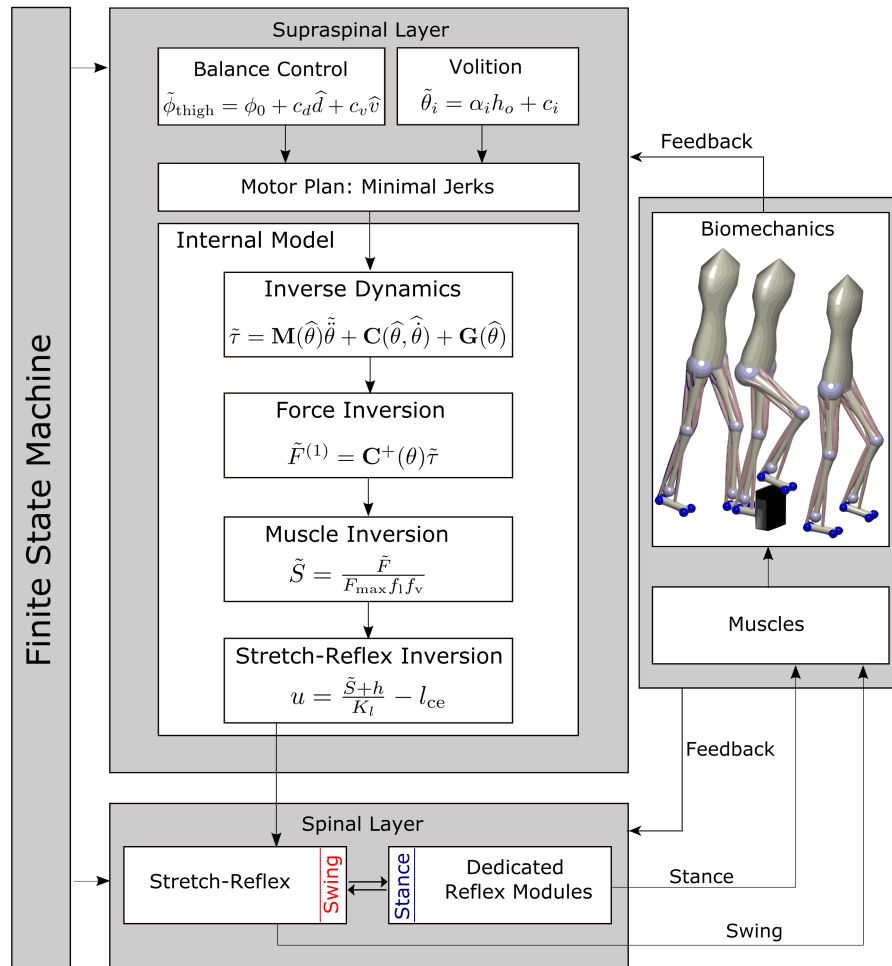

Figure 1: Overview of the model architecture. In the supraspinal layer, a balance control equation defines target joint angles for the swing leg at mid-swing and heel-strike. The target joint angles can be modified to perform volitional, goal-directed movements. A movement plan towards these target joint configurations is generated by minimal jerk trajectories that can be updated during execution. An internal inverse model comprising biomechanics, muscle moment arms, muscle activation properties and the spinal stretch reflex produces descending commands that realize the planned movement. The descending commands are integrated with the stretch reflex in the spinal layer. Stance leg control is realized with five dedicated reflex modules Song and Geyer (2015). Reflex outputs are applied to the biomechanical model that provides feedback to the controller. A finite state machine organizes switches between early swing phase, late swing phase and stance phase.

## 189 2.1.2 Volition

190 A goal for a voluntary movement of the swing limb is a desired configuration of the limb kinematics, repre-  
 191 sented by a vector of desired joint angles  $\tilde{\theta}_i$ .<sup>1</sup> In principle, this goal configuration can be anything, and we  
 192 will probe the generation of movements to randomly chosen configurations (see Section 3.1). For walking,  
 193 the goal configuration for each movement phase must be appropriate to generate a stable gait pattern, and  
 194 we use evolutionary optimization to find suitable configurations. During individual steps, the goal config-  
 195 urations can be modified to address specific tasks, such as obstacle avoidance (see Section 3.2 or balance  
 196 control (see Section 2.1.3).

## 197 2.1.3 Balance Control

198 Maintaining balance requires the integration of state feedback about the body in space into the movement  
 199 plan. We use position and velocity feedback of the trunk center to update the desired target orientation of  
 200 the thigh in space. Following Yin et al. (2007), we use the control law

$$\tilde{\phi}_{\text{thigh}} = \phi_0 + c_d \hat{d} + c_v \hat{v}, \quad (1)$$

201 where  $\phi_{\text{thigh}}$  is the desired orientation of the swing leg thigh,  $\phi_0$  is a constant offset,  $\hat{d} = d(t - \Delta t)$  are  
 202 the time-delayed horizontal displacement from the center of pressure (CoP) to the trunk segment center,  
 203  $\hat{v} = v(t - \Delta t)$  the time-delayed rate of change of that displacement and  $c_d$  and  $c_v$  are feedback gains.  
 204 Equation 1 is applied independently for the sagittal and frontal plane orientation of the thigh. We then  
 205 calculate target joint angles for each DoFs of the hip joint

$$\tilde{\theta}_{\text{hip}} = \tilde{\phi}_{\text{thigh}} - \phi_{\text{trunk}} \quad (2)$$

206 by subtracting the trunk orientation  $\theta_{\text{trunk,world}}$  from desired thigh orientation, again separately in the frontal  
 207 and sagittal planes. Note that if the target joint angle for the knee in the late swing phase is close to zero,  
 208 the thigh angle will correspond closely to the swing leg angle in space, which is relevant for balance.

## 209 2.1.4 Movement Planning

210 The swing leg is controlled in a goal-directed way according to a task-level motor plan. The task-level goal  
 211 is a kinematic configuration of the swing leg, defined by the swing leg joint angles, combined with a target  
 212 time at which the goal configuration should be reached. Goal configurations and target times are different  
 213 for early and late swing phase and can be updated to maintain whole-body balance (see Section 2.1.3 above)  
 214 or to generate specific voluntary movements. The leg will typically be far away from the goal configuration  
 215 at the onset of each movement phase, and there is an infinite number of possible movement trajectories that  
 216 will fulfill the task constraints. Human movements are generally smooth and avoid unnecessary spikes in  
 217 force and acceleration, and a standard way to plan such movements are minimum jerk trajectories (Hogan,  
 218 1984).

219 For a given combination of initial state

$$X_0 = (\theta_0, \dot{\theta}_0, \ddot{\theta}_0) \quad (3)$$

220 and goal state

$$X_{\text{tgt}} = (\tilde{\theta}, \tilde{\dot{\theta}}, \tilde{\ddot{\theta}}), \quad (4)$$

221 of joint angles, velocities and accelerations for a single joint angle  $\theta$ , and a movement duration  $T$ , the  
 222 minimum jerk trajectory is a 5th-order polynomial

$$x(t) = \sum_{k=0}^5 a_k t^k, \quad (5)$$

---

<sup>1</sup>The tilde in  $\tilde{\theta}_i$  indicates that this is a desired state of the joint angle, in contrast to the actual joint angle  $\theta_i$ . We will use this convention of the tilde to denote desired states throughout the rest of the text.



223 with parameters  $a_k$  that fulfill the constraints

$$\left(x(0), \dot{x}(0), \ddot{x}(0)\right) = X_0, \quad \left(x(T), \dot{x}(T), \ddot{x}(T)\right) = X_{\text{tgt}}, \quad (6)$$

224 which can be computed analytically depending on  $T$ ,  $X_0$  and  $X_{\text{tgt}}$ . We use a version of the minimal jerk  
 225 approach that allows changes in target states and time before the movement is complete. For every moment  
 226 in time  $t$ , we regard the current state estimate

$$X_t = \left(\hat{\theta}(t), \hat{\dot{\theta}}(t), \hat{\ddot{\theta}}(t)\right) = \left(\theta(t), \dot{\theta}(t), \ddot{\theta}(t)\right), \quad (7)$$

227 as the initial state of a new movement and compute parameters  $a_k(t)$  such that in the remaining time  $(T-t)$ ,  
 228 the movement reaches the target state  $X_{\text{tgt}}$ . From the resulting parameters  $a_k(t)$ , we compute the jerks

$$j(t) = \ddot{x}_t(t') = \frac{d^3 x_t(t')}{dt'^3}. \quad (8)$$

229 For very small remaining movement times  $T-t < 0.03$  s, we stop updating the motor plan. Integrating  
 230 these jerks over time yields a desired joint acceleration

$$\tilde{\ddot{\theta}}_{\text{swing}}(t) = a(t) = \int j(t') dt' \quad (9)$$

231 to be realized with descending motor commands. The tilde indicates that this is a planned, or desired,  
 232 joint acceleration, in contrast to the actually realized joint acceleration that will be a combination of active  
 233 and passive muscle-tendon forces, gravity, ground reaction forces and interaction torques. We will keep this  
 234 convention to use a tilde to indicate planned or desired values for a variable from here on. By applying this  
 235 procedure of updating the planned trajectory based on the estimated state during the entire movement, we  
 236 are able to adapt the initial minimal jerk trajectory to account for any external or internal perturbation and  
 237 correct the resulting errors.

238 We use this procedure to generate a minimum jerk trajectory for each degree of freedom in the swing leg  
 239 that moves the leg to the target configuration in the given time. The target joint angles for early swing and  
 240 late swing are part of the parameters set that is determined by evolutionary optimization (see Section 2.4  
 241 below).

### 242 2.1.5 Transformation into Descending Motor Commands

243 The motor plan is represented by a minimum-jerk trajectory that moves the joint configuration to the desired  
 244 state in the remaining time (see Section 2.1.4 above). At each point in time, this planned trajectory defines a  
 245 vector of desired joint accelerations  $\tilde{\ddot{\theta}}_{\text{swing}}$  for the swing leg. Executing the motor plan means realizing these  
 246 planned joint accelerations. Here we describe how this vector of desired joint accelerations is transformed  
 247 into a descending motor command that executes the motor plan. We solve this problem using inverse models  
 248 of the biomechanics, muscle force dynamics and spinal reflex arcs, with simplifying assumptions.

249 **Inverse Dynamics.** The biomechanical Equation of Motion (17) relates joint accelerations to joint torques.  
 250 We augment the planned vector of joint accelerations for the four degrees of freedom in the swing leg by  
 251 zeros (Siciliano and Khatib, 2008) in the components for the stance leg and the six free-body degrees of  
 252 freedom of the trunk to get a vector of joint acceleration for the full 14-DoF model

$$\tilde{\ddot{\theta}}_{\text{full}} = \begin{bmatrix} 0_{6 \times 1} \\ \tilde{\ddot{\theta}}_{\text{swing}} \\ 0_{4 \times 1} \end{bmatrix} \quad (10)$$

253 and use an Equation (17) to get a planned joint torque vector

$$\tilde{\tau}_{\text{full}} = \mathbf{M}(\hat{\theta})\tilde{\ddot{\theta}}_{\text{full}} + \mathbf{C}(\hat{\theta}, \hat{\dot{\theta}}) + \mathbf{G}(\hat{\theta}), \quad (11)$$

254 where  $\widehat{\theta}(t) = \theta(t + \delta_\theta)$  and  $\widehat{\dot{\theta}}(t) = \dot{\theta}(t + \delta_{\dot{\theta}})$  are time-delayed sensor estimates of the body configuration and  
 255 rate of change. We then take the swing leg components  $\tilde{\tau}_{\text{swing}}$  of

$$\tilde{\tau}_{\text{full}} = \begin{bmatrix} \tilde{\tau}_{\text{trunk}} \\ \tilde{\tau}_{\text{swing}} \\ \tilde{\tau}_{\text{stance}} \end{bmatrix} \quad (12)$$

256 as the desired joint torques for the swing leg that will execute the motor plan. We implement Equation 11  
 257 using the Inverse Dynamics block in Simulink.

258 **Muscle Moment Arm Inversion.** In order to obtain a set of muscle forces  $\tilde{F}$  that generate the desired  
 259 joint torques  $\tilde{\tau}$ , we use the Moore-Penrose pseudo-inverse (Murray et al., 1994) of the moment arm matrix  
 260  $C$  to get

$$\tilde{F}^{(1)} = \mathbf{C}^+(\theta)\tilde{\tau}. \quad (13)$$

261 The resulting force vector  $\tilde{F}^{(1)}$ , however, can contain negative forces, which cannot physically be generated  
 262 by muscles. Instead of using a computationally intensive solution like the non-negative least squares (Lawson  
 263 and Hanson, 1995), we use an iterative approximation. We separate the negative part of the resulting forces  
 264  $\tilde{F}_-^{(1)}$ , consisting of the muscle forces with negative signs from the positive part of the forces  $\tilde{F}_+^{(1)}$  and compute  
 265 the joint torques produced only by the negative forces  $\tau_-^{(1)} = \mathbf{C}(\theta)F_-^{(1)}$ . We then apply Equation 13 again on  
 266 these torques, getting  $\tilde{F}^{(2)} = -\mathbf{C}^+(\theta)\tau_-^{(1)}$ , which will also contain both positive and negative forces. Iterating  
 267 this procedure leads to progressively smaller remaining negative forces  $\tilde{F}_-^{(i)}$ . We apply this procedure for a  
 268 total number of 7 iterations and sum up all positive forces to obtain  $\tilde{F} = \sum_{i=1}^7 \tilde{F}_+^{(i)}$  as a force vector that  
 269 will approximately generate the joint torques  $\tilde{\tau}$ .

270 **Inverse Muscle Model.** The force generated by a muscle depends on its activation level and its current  
 271 length and velocity. We compute the activation needed to generate the desired muscle force  $\tilde{F}$  by inverting  
 272 the muscle model, with some simplifications. We neglect the low pass filtering of the muscle activation  
 273 which models the excitation-contraction coupling, setting  $\tilde{S} = \tilde{A}$ . We approximate the total muscle force  $F_{se}$   
 274 with the force of the contractile element  $F_{se}$ , neglecting the contributions of the passive buffer and parallel  
 275 elements. This is reasonable because the buffer and the parallel element are active only when muscles are  
 276 extensively stretched or compressed, which is usually not the case during walking.

277 We then invert Equation 19 to calculate the neural stimulation  $\tilde{S}$  needed to generate the desired muscle  
 278 force as

$$\tilde{S} = \frac{\tilde{F}}{F_{\text{max}}f_l f_v}. \quad (14)$$

279 All terms here are 22-dimensional vectors, with one component per muscle, and the operations are executed  
 280 element-wise.

281 **Spinal Stretch Reflex Modulation.** The descending commands from the high-level motor areas have  
 282 to interface with the reflex arcs in the spinal cord to generate muscle activation levels that will execute the  
 283 planned movement. Described in detail in Section 2.2 below, we assume that the descending command both  
 284 (i) directly creates muscle activation leading to contraction and (ii) shifts the reference point of the spinal  
 285 stretch reflex to a new location corresponding to the contracted state. We solve Equation 16, which models  
 286 this behavior, to calculate a descending motor command

$$u = \frac{\tilde{S} + h}{K_l} - l_{ce}. \quad (15)$$

287 Note that while we neglected the velocity term in the stretch reflex  $K_v(\widehat{v}_{ce} + \dot{u})$  here, it is this velocity-  
 288 dependent term that will initially create the direct muscle activation, determined by  $\dot{u}$ . This descending  
 289 motor command  $u$  will interact with the spinal stretch reflex to generate the desired muscle activation  $\tilde{S}$   
 290 that executes the motor plan.



## 291 2.2 Spinal Control

292 Spinal control consists of reflexive neural feedback loops, i.e. feedback laws that generate neural activation  
293 proportional to low-level proprioceptive signals about muscle length, velocity or force, modulated by descend-  
294 ing commands on a slower time-scale. We treat control of the leg during swing separately from the control  
295 of the leg during stance. While the swing leg is controlled by a combination of descending commands and  
296 a generic stretch reflex, the stance leg is controlled by specialized reflex modules that implement a specific  
297 function.

### 298 2.2.1 Swing Leg

299 During swing, the neural stimulation for each muscle is generated by a generic stretch reflex

$$S = [K_l(\widehat{l}_{ce} + u) + K_v(\widehat{v}_{ce} + \dot{u}) - h]^+, \quad (16)$$

300 where  $\widehat{l}_{ce}$  and  $\widehat{v}_{ce}$  are proprioceptive signals from muscle spindles that estimate the stretch and stretch rate  
301 of change of the muscle contractile element,  $K_l$  and  $K_v$  are gain factors,  $h$  is the resting level activation of  
302 the  $\alpha$ -motorneuron and  $u$  and  $\dot{u}$  are the descending motor command and its rate of change.

303 Note that the descending command  $u$  acts as a threshold for the reflex loop and the rate of change  $\dot{u}$   
304 is used for relative damping. When the descending command  $u$  increases to contract the muscle, both  $u$   
305 and  $\dot{u}$  will increase initially, generating a stimulation burst that is mostly driven by the rate of change  $\dot{u}$ .  
306 While formulated as a single stretch reflex with relative damping here, this is functionally equivalent to a  
307 formulation where the  $\alpha$ -motorneuron activation level is determined by a sum of a spinal stretch reflex and  
308 a descending motor command, as used in other models (Feldman, 1986; Gribble et al., 1998; Günther and  
309 Ruder, 2003; Kistemaker et al., 2007; Buhmann and Di Paolo, 2014).

310 This principle of modulating a generic stretch reflex with a descending motor command leads to the flex-  
311 ibility to execute motor plans for goal-directed movements via appropriately chosen descending commands,  
312 combined with the robustness of a stretch reflex that provides a level of postural stability to the muscle-joint  
313 system in situations where it is not part of a goal-directed movement.

### 314 2.2.2 Stance Leg

315 During stance, the leg is controlled by purely spinal mechanisms, without modulation by descending motor  
316 commands and without the flexibility to execute goal-directed movements. Proprioceptive information from  
317 different muscles and joints is mapped to proportional muscle activation in a set of dedicated neural control  
318 laws that implement specific functions, organized in five modules following Song and Geyer (2015). Briefly,  
319 the modules (1) generate compliant, spring-like leg behavior, (2) prevent knee overextension, (3) keep the  
320 trunk upright, (4) compensate interaction torques from swing leg movements and (5) dorsiflex the ankle  
321 joint to prevent hyperextension. Please refer to Song and Geyer (2015) for details.

## 322 2.3 Musculoskeletal Mechanics

### 323 2.3.1 Body Model

324 The body model represents a person of 180 cm height and 80 kg weight. It is composed of seven body  
325 segments, eight degrees of freedom (DoF) and 22 muscle-tendon units (MTU). Body segments comprise two  
326 thighs, shanks and feet, and a trunk segment that represents the entire upper body, including head and arms  
327 (Song and Geyer, 2015). Revolute joints link the body segments with two DoFs at each hip (pitch and roll),  
328 one DoF at the knees (pitch) and one DoF at the ankles (pitch). The equation of motion

$$\tau = \mathbf{M}(\theta)\ddot{\theta} + \mathbf{C}(\theta, \dot{\theta}) + \mathbf{G}(\theta) + \mathbf{T}_{\text{ext}} \quad (17)$$

329 relates joint torques  $\tau$ , gravitational torques  $\mathbf{G}$  and external torques  $\mathbf{T}_{\text{ext}}$  to joint accelerations  $\ddot{\theta}$ , where  $\mathbf{M}$   
330 represents the mass matrix and  $\mathbf{C}$  the velocity dependent terms. Joint accelerations  $\ddot{\theta}$  and torques  $\tau$  are  
331 14-dimensional vectors, with the eight internal DoFs and six free-body DoFs for translation and orientation  
332 of the trunk segment. Note that the six free-body DoFs of the trunk are un-actuated. Geometry and inertia  
333 of the body segments are adopted from Song and Geyer (2015).

334 Each leg is actuated by eleven Hill-type MTUs that are either mono- or biarticular (see Section 2.3.2  
 335 below for details). Nine MTUs actuate the three pitch joints (hip, knee, ankle) and two MTUs actuate  
 336 the hip roll joint. Pitch joint muscles model the lumped hip flexors, glutei, hamstrings, rectus femoris,  
 337 vasti, biceps femoris short head, gastrocnemius, soleus and tibialis anterior. Roll joint muscles represent the  
 338 lumped hip adductors and hip abductors. Muscles forces translate into joint torques via state-dependent  
 339 moment arms that are adopted from Song and Geyer (2015), via

$$\tau = \mathbf{C}F, \quad (18)$$

340 where  $F$  is the 22-dimensional vector of muscle forces and  $C$  is the  $14 \times 22$  matrix of moment arms.

### 341 2.3.2 Muscle-Tendon Units

342 Each muscle tendon unit (MTU) is composed of a parallel element (PE), a buffer element (BE), a contractile  
 343 element (CE) and a serial elastic element (SE). We provide an overview here and refer the reader to Geyer  
 344 and Herr (2010) for details. The contractile element is the actual active muscle element. It is innervated by  
 345 the  $\alpha$ -motorneurons and exerts the force

$$F_{ce} = AF_{\max}f_l(l_{ce})f_v(v_{ce}). \quad (19)$$

346 Here,  $F_{\max}$  is the maximum isometric force,  $f_l(l_{ce})$  and  $f_v(v_{ce})$  are the force-length and force-velocity relation-  
 347 ships and  $A$  is the muscle activation level. The serial element models the tendon and applies the generated  
 348 forces  $F_{se}$  to the body. The parallel element passively prevents the muscle from being stretched extensively  
 349 and exerts a force  $F_{pe}(l_{ce})$  after the muscle lengths exceeds a certain maximal length. In contrast, The buffer  
 350 element is a passive element that prevents the muscle from being compressed too much. It generates the  
 351 force  $F_{be}(l_{ce})$  only after the muscle length shortens below a certain minimal length. Muscle activation  $A$  is  
 352 modeled as a first-order low-pass filtered copy of the neural stimulation  $S$  representing the  $\alpha$ -motorneuron  
 353 output

$$A = S - \tau_A \frac{dA}{dt} \quad (20)$$

354 where  $\tau_A$  is a time constant Gribble et al. (1998). The total force  $F_{mtu}$  generated by a MTU is given by

$$F_{mtu} = F_{se} = F_{ce} + F_{pe} - F_{be}. \quad (21)$$

### 355 2.3.3 Ground Contact Forces

356 Ground contacts at each foot are modeled with four contact points, two at the heel and two at the front  
 357 of the foot, with a lateral displacement of 5 cm between the two points at the heel and 10 cm at the front.  
 358 We compute ground reaction forces by using the inbuilt MATLAB Spatial Contact Force block. Contact  
 359 parameters are chosen to simulate an asphalt surface.

## 360 2.4 Parameters and Tuning

361 The model contains a large number of parameters for different components of the model. Some of these  
 362 parameters are constrained by the neurophysiological literature and set to constant values based on estimates.  
 363 To determine the other parameters, we use an evolutionary optimization algorithm similar to the one used  
 364 in Song and Geyer (2015), based on the covariance-matrix adaptation technique (Hansen, 2006), using the  
 365 cost function

$$J = \begin{cases} 2c_0 - x_{\text{fall}} & \text{if fall} \\ c_0 + d_{\text{steady}} & \text{else} \end{cases} \quad (22)$$

366 The first part of the cost function generates basic walking without falling and the second part generates  
 367 steady locomotion. The constant  $c_0 = 10^3$  is a normalization factor and  $d_{\text{steady}}$  measures the “steadyness”  
 368 of the gait. We calculate  $d_{\text{steady}}$  as

$$d_{\text{steady}} = \sum_{j=n-2}^n \sum_{i=1}^{\text{limb}} \left[ p_i(\text{HS}_j) - p_i(\text{HS}_{j-1}) \right], \quad (23)$$

| Parameter                    | value (s) |
|------------------------------|-----------|
| $d_\theta$                   | 0.01      |
| $d_{\dot{\theta}}$           | 0.01      |
| $d_{\ddot{\theta}}$          | 0.01      |
| $d_{\text{muscle length}}$   | 0.01      |
| $d_{\text{muscle velocity}}$ | 0.01      |
| $d_{\text{balance control}}$ | 0.1       |
| $d_u$                        | 0.0025    |
| $d_{\dot{u}}$                | 0.0025    |
| $d_l$                        | 0.0025    |
| $d_v$                        | 0.0025    |

Table 1: Time Delays.

369 with  $p_i$  being the relative Cartesian position of the  $i$ -th limb and  $HS_j$  being the  $j$ th-last left heelstrike.

370 We optimize a total amount of 52 parameters. The same set of parameters is used for all experiments  
371 described in the results section.

### 372 3 Results

373 The model generates stable walking behavior with a movement speed of about 1.3 m/s. The walking pattern  
374 roughly matches human data. Figure 2 compares joint angle trajectories across one gait cycle averaged over  
375 a 100 s walk to human walking data from a public data set (Fukuchi et al., 2018). The human data is from  
376  $N=24$  healthy young participants (10 female, age  $27.6 \pm 4.4$  years, height  $171.1 \pm 10.5$  cm, and mass  $68.4$   
377  $\pm 12.2$  kg) walking overground at their self-selected, comfortable speed. Panel A shows hip flexion angle for  
378 the model (blue) with human data (orange). The overall shape of the model trajectory matches human data.  
379 At about 90 % of the gait cycle, the model flexes the hip more strongly than the average experimental data.  
380 The model movements are also less smooth than the experimental data. Panel B shows the knee flexion  
381 angle. Again, the model generally follows the human pattern. During the stance phase, the model exhibits  
382 two sharp peaks while human data shows one wider peak in contrast. During swing, humans extend their leg  
383 a little earlier than the model does. Panel C shows the hip adduction angle. Here, the overall shape of the  
384 model data differs from human data. The model trajectory is less smooth and has less overall range of motion  
385 throughout the gait cycle. Note, however, that the hip adduction in humans is quite variable, and despite  
386 the structural differences, the model data lies within the confidence interval of human data during a large  
387 part of the gait cycle. Panel D shows the ankle flexion angle. The overall pattern of the model trajectories  
388 differs significantly from the human data. The ankle dorsiflexion peak is slightly after mid-stance, much  
389 earlier than in the human data. In swing, the model shows consistently higher dorsiflexion than humans.

390 In order to investigate the robustness of the models walking behavior, we exposed it to external per-  
391 turbations in the form of force pulses of increasing strengths applied at the center of the trunk segment  
392 in different directions. Perturbations started at foot contact, lasted for 0.2 s, and were directed forward,  
393 backward, medially or laterally. Force amplitude was ramped up until the model failed to maintain balance  
394 after the perturbation, starting at 50 N and increasing in steps of 50 N. After the model fell, we decreased  
395 the step size to 5 N from the previous value, until it fell again. The maximal force the model was able to  
396 withstand without falling was 340 N for lateral, 305 N for medial, 165 N for forward and 130 N for backward  
397 pushes.

#### 398 3.1 Swing Leg Movement

399 We evaluate the ability of the model to plan and execute voluntary movements with the swing leg in three  
400 simulation studies. For each movement type, we demonstrate that the control of voluntary movement works  
401 and the limb follows the movement trajectory as planned. To isolate the swing leg and remove balance control  
402 as a factor for these stimulation studies, we passively stabilized the trunk segment by fixing its position in

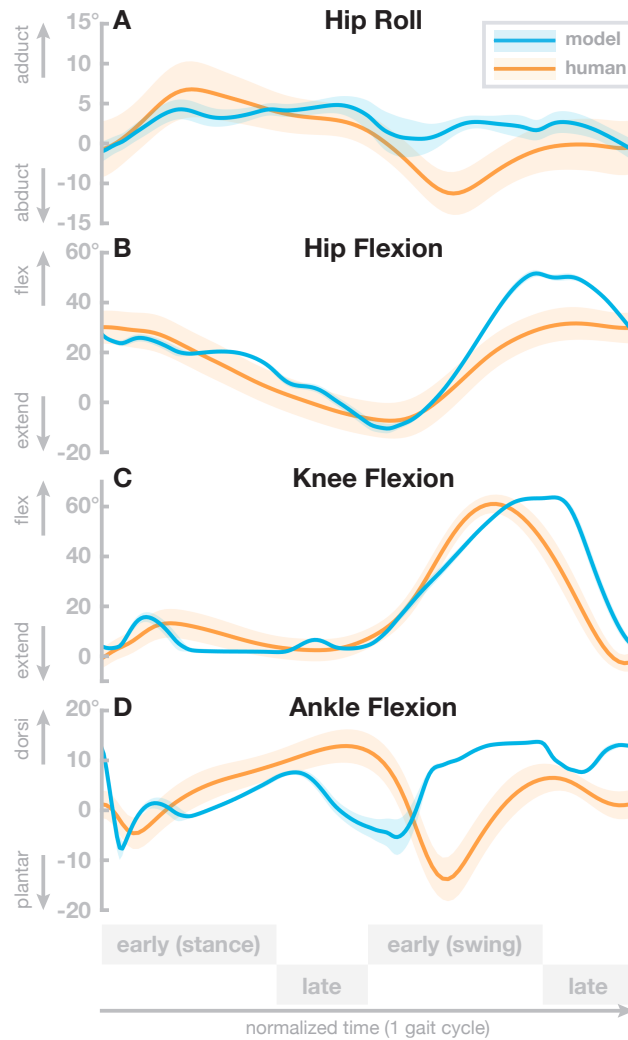

Figure 2: Comparison with human data. Averaged hip pitch, hip roll, knee and ankle joint angle trajectories for human data (orange) and model data (blue). The model data are averaged over 100 seconds of steady state walking. Human data are taken from Fukuchi et al. (2018). Solid lines are means and shaded areas are 95% confidence intervals, across participants for the human data and across gait cycles for the model.

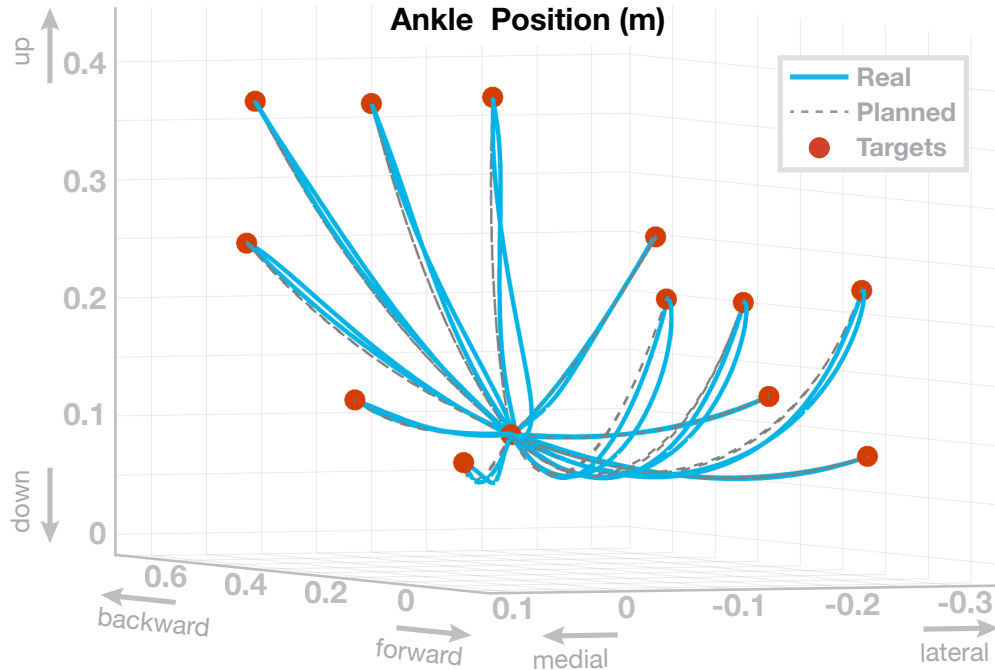

Figure 3: Swing leg ankle paths for a sequence of twelve center-out-return movements with passively stabilized trunk. The dashed lines show the planned paths and the blue lines show the realized ankle paths.

403 space.

404 In the first simulation study, we show that the model can perform individual reaching movements with the  
405 foot. The model performs a sequence of center-out reaching movements with the foot to twelve different  
406 target locations, followed by a return movement to the center location. Target locations were defined as  
407 positions for the ankle and transformed into joint space using the inverse kinematics solution in the MATLAB  
408 RigidBodyTree toolbox. The movement plan in joint space from the current to the target configuration was  
409 then generated as described in Section 2.1.4 above. The specific target locations were chosen to cover a large  
410 portion of the workspace, without being too close to the limits, resulting in path lengths between roughly  
411 0.20–0.55 m. Each single movement segment had a duration of 0.5 s. Figure 3 shows the resulting movement  
412 paths of the ankle position in workspace for this sequence of reaching movements. The ankle always reaches  
413 the target positions reasonably well. The largest deviation from the planned path is at the start of the first  
414 movement, to the top right target, which is due to the muscles being initialized without tension. The paths  
415 match the reference paths with an overall root-mean-squared error of 0.003 m between the planned and the  
416 actual ankle position.

417 In the second simulation study,

418 the model performs repetitive goal-directed movements between two points in joint space over 10 s,  
419 following sinusoid profiles with 1 Hz for each joint. Figure 4 shows the resulting joint angle trajectories  
420 (solid lines) and the planned trajectories for each joint (dashed lines). The real joint angle trajectories are  
421 a good fit of the planned movement, with only the ankle joint showing more than minimal deviation of the  
422 real trajectories from the movement plan.

423 In a third simulation study, we explore the flexibility of the model to generate goal-directed reaching  
424 movements with the foot between randomly chosen points in the joint space at a wide range of different  
425 speeds. For each movement, the target configuration was drawn from a uniform distribution over the interval  
426 from 15–85% of the joint range of motion for each joint. This margin was chosen relatively large, to prevent  
427 extreme body configurations. For ten different movement times ranging from 0.1 – 0.6 s, we simulated 100  
428 randomized movements each. We quantified performance as the root mean squared error between the actual  
429 and the planned trajectory. Figure 5 shows the average error for the different movement speeds in joint  
430 space. The error is high for very fast movements. For normal movement times of 0.25 seconds and above,

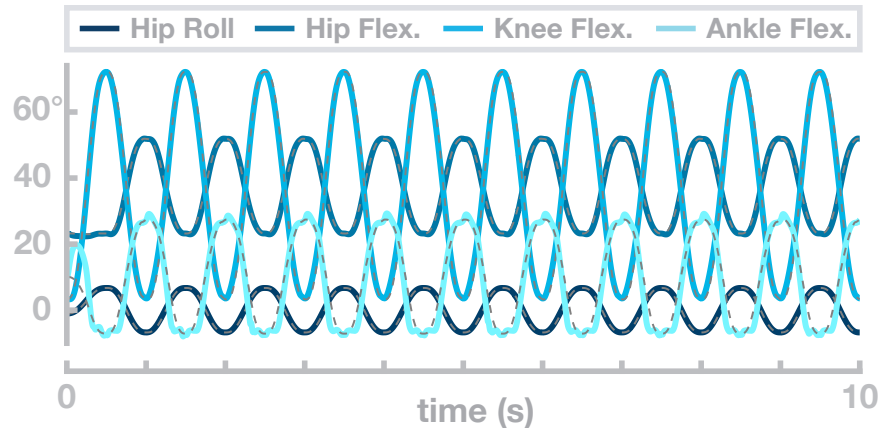

Figure 4: Example movement trajectories of the swing leg with a passively stabilized trunk. The dashed black lines show the planned movement trajectory and the blue lines show the realized joint angle trajectories.

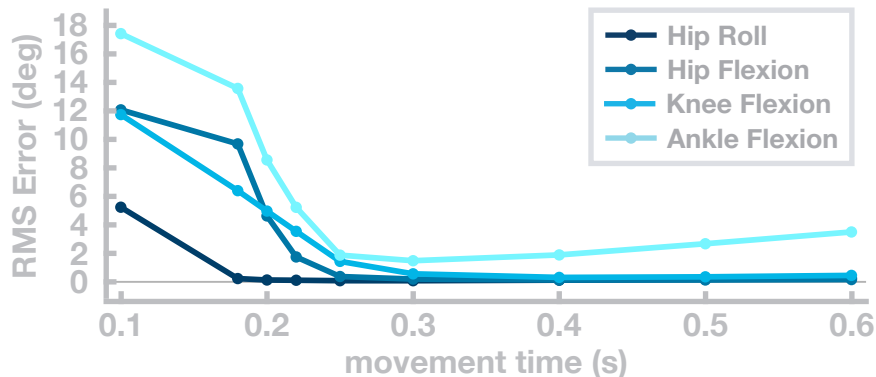

Figure 5: Joint-space error for single movements with different movement times. Each curve shows the root-mean-squared error the respective joint.

431 the error drops below  $1^\circ$  for the hip and knee joints. For the ankle joint, the error reaches a minimum of  
 432  $\approx 2^\circ$  at the 0.3 second duration and then increases again.

### 433 3.2 Obstacle Avoidance

434 We use an obstacle avoidance task to assess the ability of the model to integrate flexible swing leg movements  
 435 control of upright balance during walking. We test two different avoidance strategies, (1) lifting the swing  
 436 leg to step over an obstacle and (2) shifting the swing leg sideways to step around an obstacle. To avoid an  
 437 obstacle, we adjust the movement plan for the early swing phase by updating the target joint angles  $\tilde{\theta}_i$  for  
 438 the early swing phase based on the obstacle position and size. We used a linear mapping

$$\tilde{\theta}_i = \alpha_i h_o + c_i, \quad (24)$$

439 to determine the target joint angles, where  $h_o$  is the obstacle extension, i.e. the height for sagittal and the  
 440 width for medial-lateral avoidance, including a security margin. The joint index  $i$  ranges over the ankle, knee  
 441 and hip flexion degrees of freedom for sagittal and the hip abduction joint for medial-lateral avoidance, and  $c_i$   
 442 is a constant offset. We determined these parameters in an ad-hoc manner based on a few sample movements  
 443 with hand-fitted values. After mid-swing, foot placement and balance recovery recovery is controlled by the  
 444 usual balance-control strategy described in Section 2.1.3. We tested obstacle avoidance in both directions  
 445 on obstacles of different sizes. An example of the model stepping over an obstacle is shown on the right in  
 446 Figure 1.



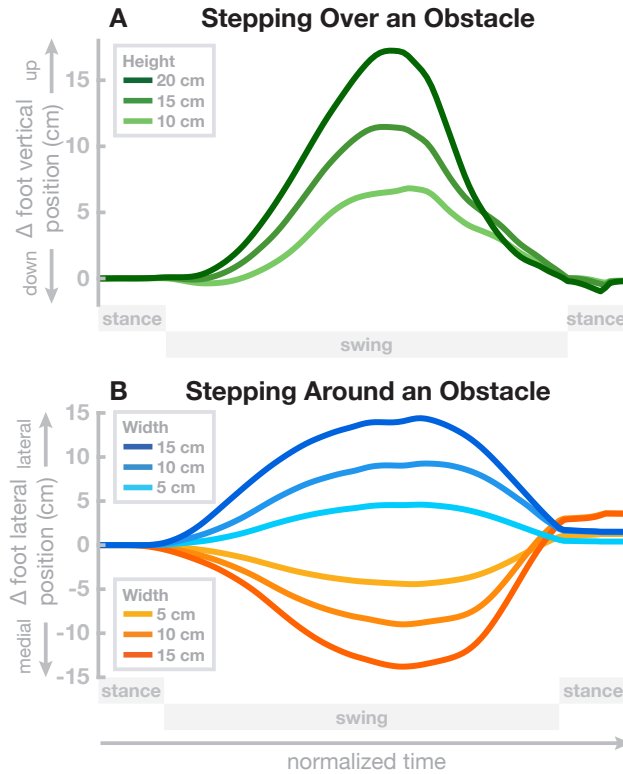

Figure 6: Avoiding obstacle during steady-state walking. Panel A shows the change from the normal trajectory without obstacle in the vertical direction when stepping over obstacles of varying height. Panel B shows the change from the normal trajectory without obstacle in the medial-lateral direction when stepping around obstacles of varying width, in either direction. Both panels show the movement from left heel-strike to push-off of the stance foot.

447 For sagittal avoidance, we simulated obstacles of 15cm, 20cm and 25 cm height. All three obstacles are  
 448 successfully avoided and the model returns to the original gait within the subsequent step. Panel A in Figure  
 449 6 shows the difference between the balls of the foot relative to the normal movement with no obstacle, in  
 450 the vertical direction, for these movements. The peaks of these difference plots show that in each movement  
 451 the balls of the foot are successfully shifted upwards by the obstacle height, plus a safety margin. Note that  
 452 these vertical positions are differences from the normal foot movement trajectory and the absolute vertical  
 453 position of the foot is higher, around  $\approx 10$  cm at mid-swing.

454 For medial-lateral avoidance, we simulated obstacles of 5 cm and 10 cm width, and both lateral and  
 455 medial avoidance. Panel B in Figure 6 shows the differences between the balls of the foot relative to the  
 456 normal movement with no obstacle, in the medial-lateral direction, for these movements. Similar to the  
 457 sagittal avoidance, the peaks show that the movements are successfully shifted sideways by the desired  
 458 amount corresponding to the width of the obstacle, plus a safety margin.

### 459 3.3 Direction and Speed Control

460 The model has a limited degree of flexibility to walk at different movement speeds and change direction.  
 461 To change speed, we change the average trunk lean angle by varying the target orientation of the trunk  
 462 in the spinal reflex module for upright trunk stabilization (see Section 2.2.2 and Song and Geyer (2015)).  
 463 Generally, increasing the trunk forward lean makes the model walk faster. To explore this relationship, we  
 464 simulated 40 s of the model walking with 13 different random values for target orientation of the trunk,  
 465 drawn from a uniform distribution between 6–8.5°. Figure 7 plots the resulting walking speed of the model  
 466 in Panel A. Walking speed depends roughly linearly on the trunk, as shown by the linear fit ( $R^2 = 0.9157$ ).  
 467 Panel B in Figure 7 shows how the stepping cadence varies depending on trunk lean for the same walking

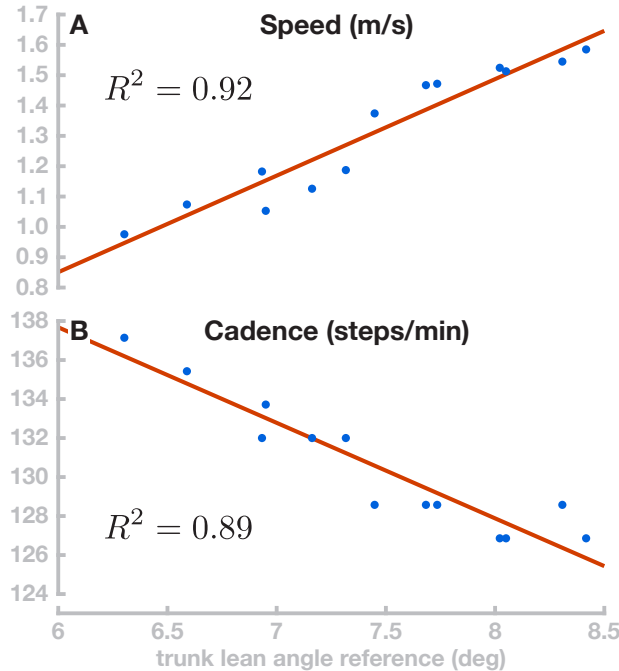

Figure 7: Velocity and cadence control. Panel A shows the relationship between the reference parameter for trunk lean and the resulting movement speed for 13 movements (blue dots) and the linear fit (red line). Panel B shows the effect of the trunk lean change on the walking cadence.

468 simulations. Interestingly, higher walking speeds are associated with lower cadences. This is opposite to what  
469 is observed in humans, where cadence tends to increase with walking speed in normal walking (Nilsson and  
470 Thorstensson, 1987). We interpret this as an indicator that the speed variations are not actively controlled,  
471 but rather emerge from the interaction of the trunk lean with balance control. Increased trunk lean leads to  
472 larger gravitational acceleration and higher speeds, which results in the balance control module increasing  
473 the target for the swing leg angle (Equation 1). This generates longer steps and decreases cadence.

474 Although the model has no rotational degree of freedom at the hip, it is possible to change the direction  
475 of movement in a limited fashion. Similar to speed control, we achieve this by exploiting an interaction  
476 between movement direction and balance control. Temporarily adding a constant value to the hip roll target  
477 angle causes a weak destabilization of the model. This destabilization in turn induces a rotational slight  
478 slipping of the stance foot during weight acceptance that results in the body turning. We use this effect in an  
479 ad-hoc control law for movement direction that adds this constant offset to the hip roll target angle when the  
480 horizontal orientation of the trunk segment lies outside a desired interval around the target direction. We  
481 demonstrate this direction control scheme by simulating four walks with different target orientations of  $0^\circ$ ,  
482  $15^\circ$ ,  $30^\circ$  and  $45^\circ$ , all starting at  $0^\circ$  and simulated for 100 s. Figure 8 shows the resulting walking patterns.  
483 For all four target orientations, the model approximately turns to the target orientation after about 20 m  
484 walking. However, this mode of direction control is not very stable and has clear limitations. The 15 deg  
485 and 30 deg movements turn away from the target orientation at about 16 meters of walking even though  
486 they reached the target orientation relatively fast after 12 m.

## 487 4 Discussion

488 We presented a musculoskeletal model of human locomotion that combines stable walking behaviour with  
489 the flexibility to generate voluntary movements with the swing leg according to a kinematic motor plan  
490 and to adapt the gait pattern. The model combines biomechanics, muscle physiology, spinal reflex loops  
491 and supraspinal neural processes in a physiologically plausible way. The supraspinal layer organizes the  
492 behavioural sequence, generates a movement plan on the task level and transforms the movement plan into

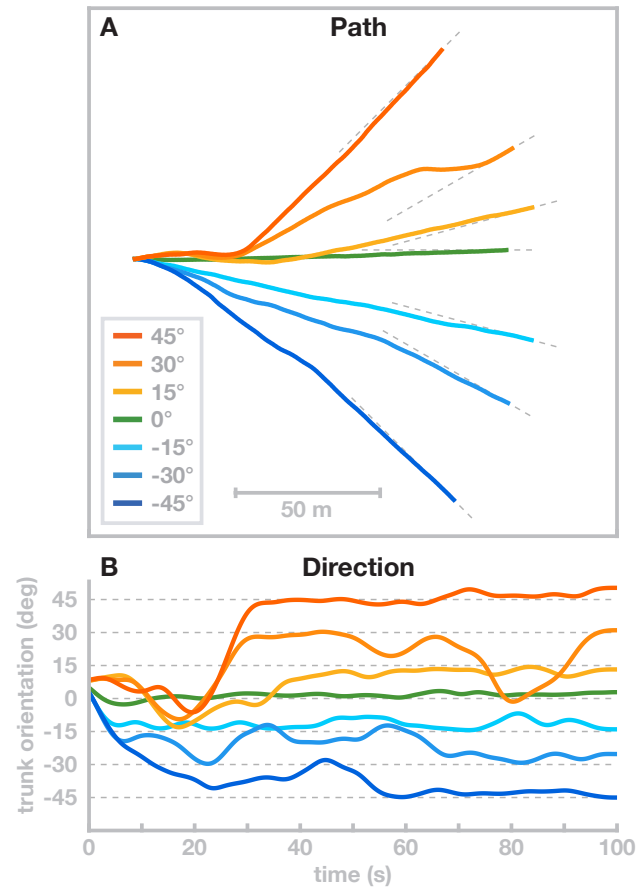

Figure 8: Direction control. Movement direction was adjusted by temporarily adding a constant offset value to the hip roll target angle until the target movement direction was reached, with seven different target directions. Panel A shows the horizontal path of the trunk center. Panel B shows the trunk orientation over time.

493 descending motor commands that interface with the spinal cord. The spinal layer combines the descending  
494 motor commands for the swing leg with stretch reflex arcs for each muscle by shifting the muscle activation  
495 thresholds of the reflexes based on the descending command. Stance leg control is exclusively spinal, con-  
496 sisting of five dedicated reflex modules that each implement a specific function, following (Song and Geyer,  
497 2015). The model generates stable walking patterns and can flexibly move the swing leg according to a  
498 kinematic plan to avoid obstacles. It can withstand external perturbations and change walking speed and  
499 movement direction to a limited degree.

## 500 4.1 Motor Plans and Voluntary Movements

501 The main innovation of the model we presented here is the ability to plan and execute voluntary movements  
502 with the swing leg, and to integrate these flexible swing leg movements into a stable gait cycle. Neurosci-  
503 entists generally differentiate actions into two categories of *volitional* and *reflexive* actions (Balleine, 2019).  
504 Volitional actions are understood to be goal-directed, model-based and prospective, whereas reflexive actions  
505 are habitual, model-free, and retrospective (Dolan and Dayan, 2013). Volitional actions are caused by a de-  
506 sire to reach a certain state in the future, whereas habitual or reflexive actions are caused by a stimulus in the  
507 past. While most of this work is at the intersection between neuroscience and psychology and investigates  
508 decisions, it intersects the field of motor planning and control.

509 Walking is largely considered a reflexive movement, although it requires some executive control (Clark,  
510 2015). Decerebrated cats are able to walk without their brains, with only a tonic stimulation of their spinal  
511 cords (Whelan, 1996). Models of bipedal locomotion show that reflexes are sufficient to generate stable  
512 walking patterns in principle (Günther and Ruder, 2003; Geyer and Herr, 2010; Song and Geyer, 2015). The  
513 only high-level modulation required in these models is for balance control. Precise, goal-directed movements,  
514 on the other hand, generally require cortical control. When receiving a motor cortex lesion, rodents and  
515 primates initially lose the ability to perform goal-directed reaching movements (Whishaw, 2000; Darling  
516 et al., 2011). Lesioned animals tend to recover some or large parts of the lost motor function over weeks  
517 or months after the lesion, either by local reorganization and neural plasticity (Darling et al., 2011) or by  
518 developing compensatory movements (Gharbawie and Whishaw, 2006). Even for goal-directed movement,  
519 the brain might not be critical. Kawai et al. (2015) showed that when rats learn a complex sequential lever  
520 press movement, they can still execute the learned movement after a lesion to the motor cortex. When  
521 receiving the motor cortex lesion before training, however, the rats were unable to perform or learn the lever  
522 press movement. Walking can be performed reflexively in steady-state on even or mildly uneven ground.  
523 More stringent constraints, such as walking over stepping stones or across a field cluttered with obstacles,  
524 require precise movements based on sensory information with a goal of getting the foot precisely onto a  
525 stepping stone, or around an obstacle Patla et al. (1991); Chou et al. (2001).

526 Existing models of walking are mostly reflex-based (Günther and Ruder, 2003; Geyer and Herr, 2010; Song  
527 and Geyer, 2015; Ong et al., 2019; Di Russo et al., 2021). The walking movement pattern can be modified to  
528 some degree in various models to change speed or step over obstacles, but these modifications are designed  
529 for and limited to a specific target behavior. Taga (1998) shows shows that a walking model driven by a  
530 neural oscillator can adjust step length by adjusting timing and magnitude of the hip flexor activity, and  
531 increase toe clearance by superposing an additional descending motor command to the knee flexor muscles  
532 over the rhythmic activity. The model can step over obstacles placed at arbitrary positions by combining  
533 modulation of step length and toe clearance, but it lacks the control to move the foot along a specific path.  
534 Song and Geyer (2015) show that a model that is almost exclusively controlled by low-level reflexes can be  
535 generate stable walking movements in 3d. They achieve balance by modulating the reflex parameters slightly  
536 based on high-level information about the body in space. The model is robust in rugged terrain and has a  
537 certain degree of adaptability in that it can be made to walk at different speeds and change toe clearance  
538 to step over an obstacle. Adaptation is achieved by re-tuning the reflexes that map sensory information to  
539 muscle activation to a new cost function using evolutionary optimization Hansen (2006). Effectively, the  
540 model learns each behavior individually. Van der Noot et al. (2018) showed that it is possible to generalize  
541 between different sets of learned behaviors by interpolating between parameter sets, which generally results  
542 in an intermediate behavior. The mechanism can be used to combine the purely reflexive walking generation  
543 in this class of model with a degree of central control, that maps a low-dimensional task parameter like  
544 walking speed onto a high-dimensional set of reflex parameters that will generate a walking pattern with

545 the desired walking speed. But the movements generated by these models are still largely habitual, in that  
546 muscle activation is generated reflexively based on the current state of the system, rather than a desired  
547 future state and a motor plan for how to get to that state – they still lack the flexibility to plan and execute  
548 voluntary movements.

549 In the work presented here, we developed a model that combines reflexive control of the stance leg with  
550 precise, goal-directed movements of the swing leg to generate walking movements that can be flexibly adapted  
551 to solve a task. Swing leg movements are planned on task level in the form of minimum jerk trajectories  
552 for kinematic task variables. The motor plan is represented as a trajectory that moves the task variable to  
553 a desired value in a specified time. For instance, swinging the leg forward is a planned movement of the  
554 thigh segment angle in the sagittal plane from a negative value at push-off to the positive value required  
555 for a successful heel-strike of the next step. This motor plan is updated during the movement to account  
556 for deviations from the planned trajectory of the task variable (see Section 2.1.4), and also to incorporate  
557 changes in the goal value required to maintain balance (see Section 2.1.3). To execute this motor plan,  
558 an inverse model of the spinal stretch reflex, muscle properties and biomechanics is used to calculate a  
559 descending motor command.

560 Our model has the flexibility to execute any movement plan as a volitional, goal-directed action. It can  
561 track random kinematic trajectories with high precision (see Section 3.1) when passively stabilized at the  
562 trunk. When moving freely, it can utilize this flexibility to move the leg over and around obstacles during  
563 swing. This flexibility is new for a walking model.

564 The model combines this flexibility with the ability to execute habitual movements, represented by sub-  
565 cortical reflexes that directly map sensory information to muscle activation. Stance leg control is completely  
566 reflexive, while swing leg control combines the flexibility of goal-directed movements with the robustness of  
567 spinal stretch reflexes. The coordination of these two different types of behavior is organized by state-based  
568 switches. The neural mechanisms that implement this ability to smoothly swap between different types  
569 of movement and sequentially combine habitual, reflexive with volitional, goal-directed behavior are thought  
570 to be located in the basal ganglia (Lanciego et al., 2012). Impairments to these structures, for instance  
571 from cell loss associated with Parkinson’s Disease, leads to reduced ability to switch between reflexive and  
572 goal-directed behavior, e.g. a reduced ability to voluntarily initiate gait from a standing posture, or the  
573 freezing of gait in some people with PD, which predominantly occurs in situations where environmental  
574 constraints require a goal-directed, planned modulation of a steady-state gait pattern, such as navigating  
575 through a doorway or over an obstacle (Peterson and Horak, 2016; Warabi et al., 2018). A mechanistic  
576 understanding of how impairments in neural function lead to specific motor deficits would require a model  
577 that encompasses both volitional and habitual movements, the neural mechanisms switching between them,  
578 and the integration with the spinal reflexes, muscle physiology and biomechanics that ultimately generate  
579 the movement. The model described here represents a first step towards such a mechanistic understanding.

## 580 4.2 Integration of High-level Control and Spinal Reflexes

581 For the swing leg control, our model uses a general stretch reflex that increases neural stimulation of the  
582 muscle based on the sensory information from muscle spindles and Golgi tendon organs about the length,  
583 velocity and force of the muscle (see Equation 16 and Latash, 2008). The descending command  $u$  shifts  
584 the set-point of this muscle-length feedback loop, and  $\dot{u}$  does the same for the velocity feedback. Similar  
585 equations have been used in various neuromechanical models of motor control, mostly of the upper limb  
586 (Feldman, 1986; Günther and Ruder, 2003; Kistemaker et al., 2007; Buhmann and Di Paolo, 2014), but also  
587 in standing (Reimann and Schöner, 2017) and walking (Günther and Ruder, 2003).

588 Technically, the formula we use is very similar to the equation used in the equilibrium point hypothesis  
589 approach to motor control (Feldman, 1986). This approach postulates that the spinal cord reflex modules  
590 simplify the control problem for the high-level areas, so that in order to move a limb to a desired position,  
591 the high-level controller only has to specify an equilibrium point corresponding to that position, and the low-  
592 level spinal reflexes generate the details of the actual movement (Feldman, 1986; Buhmann and Di Paolo,  
593 2014). Modifications use different patterns of the descending command trajectory, like ramps or N-shapes  
594 (Latash and Gottlieb, 1991; Gribble et al., 1998). While more complex, these still adhere to the underlying  
595 concept that the structure of the descending command is simple and the spinal cord accounts for most of  
596 the complex details of the resulting movement pattern.

597 Despite the technical similarity in the stretch reflex, our model differs in the concept behind the equi-  
598 librium point hypothesis that the descending commands are simple. We found that considerable complexity  
599 is required to successfully generate movements that are both precise and flexible. One source of complexity  
600 are the highly non-linear inertial, gravitational and interaction forces that arise during locomotion. In a  
601 previous model of balance control in standing that with a similar control approach of shifting thresholds for  
602 stretch reflexes, we found that an internal model of the mass distribution and muscle moment arms across  
603 the joints and body segments was sufficient to maintain balance (Reimann and Schöner, 2017). Specifically,  
604 the model did not include gravitational or velocity dependent interaction forces. Still, the inertial forces  
605 alone are sufficiently complex to break the direct correspondence between task-level motor plan and muscle-  
606 level control, suggesting that an intermediate step is required to translate the high-level motor plan into  
607 descending commands.

608 In the system presented here, we implemented this intermediate step transforming the high-level motor  
609 plan into low-level descending commands with an internal model of the body biomechanics, muscle properties,  
610 and the stretch reflex. We do not claim that this is part of our model neurophysiologically plausible. Rather,  
611 we see it as a necessary connection between two systems with well-documented neurophysiological functions.  
612 There is good evidence that the higher motor areas in the brain plan and monitor movements using a task-  
613 level representation, e.g. the position or velocity of the hand when reaching to a target (Georgopoulos and  
614 Grillner, 1989; Schwartz and Moran, 1999; Churchland et al., 2012; Hodgson and Hogan, 2000). There is  
615 similarly good evidence for low-level reflex arcs in the spinal cord, mapping proprioceptive signals directly  
616 to  $\alpha$ -motorneuron activation (Sharbafi and Seyfarth, 2017; Kiehn, 2016). How the high-level movement plan  
617 is integrated with the low-level reflexes is currently not well understood (Albert et al., 2020; Ambike et al.,  
618 2015; Stollenmaier et al., 2020).

619 In the present model, we used analytical inversion of the model equations and real-time re-planning for  
620 online updating to implement a module that functionally solves this problem of connecting the task-level  
621 motor plan with low-level motor areas in the spinal cord. We assume that this functionality is implemented  
622 neurally in the actual nervous system, solving the same problem but with a very different internal structure.  
623 There is some conceptual overlap with this notion and the equilibrium-point hypothesis, namely that there is  
624 a high-level motor control area that plans and generates movement on task level and then hands the details  
625 of execution over to more low-level structures. In walking, the present model shows, this transformation is  
626 of considerable complexity and needs to be addressed to generate movement patterns that actually walk.

### 627 4.3 Rhythmic Pattern Generation

628 In human walking, muscle forces, neural activity and ground reaction forces interact to generate rhythmic  
629 movement patterns. Existing approaches to model the dynamics of this combined system fall broadly in two  
630 categories, where the rhythmic neural pattern driving the motor system is either generated centrally Taga  
631 (1995a), or emerges from the interaction between the body and the ground, fed back into the nervous system  
632 via sensory organs Song and Geyer (2015); Geyer and Herr (2010); Ong et al. (2019); Geijtenbeek et al.  
633 (2013); Wang et al. (2012). In the first approach, a dedicated neural structure, often called a central pattern  
634 generator (CPG), transforms a tonic neural activation into a rhythmic activation pattern between multiple  
635 neurons. CPGs are well-documented in insects (Guertin, 2013; Mantziaris et al., 2020). Evidence for CPGs  
636 has been found in cats, where a decerebrated cat can still walk when receiving tonic electrical stimulation at  
637 certain sites in the spinal cord (Whelan, 1996). Taga (1995a) uses this approach to model human movement.  
638 In this model, a bank of neural oscillators drives the activation of the agonist-antagonist muscles spanning the  
639 leg joints, with one oscillator per joint. The structure of the neural oscillators broadly follows older models  
640 of spinal stepping generators (Miller and Scott, 1977; Kawahara and Mori, 1982), consisting of two neurons,  
641 one activating the agonist and one the antagonist muscle of a joint. Such systems have stable oscillation  
642 patterns even in the absence of external inputs (Matsuoka, 1985), though in Taga’s model both input and  
643 output are modulated depending on sensory data and the behavioral state, e.g. stance vs. swing. This model  
644 generates stable and robust walking patterns in the sagittal plane and can adapt to uneven terrain and  
645 additional loads (Taga, 1995b). Walking speed can be increased by adding tonic input and cadence can be  
646 controlled to a limited degree via entrainment by adding a rhythmic input.

647 In a second category of models, the rhythmic activity does not arise from neural oscillators, but from the  
648 interaction between neural control and the environment. In this class of models, muscle force generated by



649 reflexes that drive a limb to a desired configuration, e.g. the swing leg forward after pushing off the ground.  
650 Different reflexes are turned on and off depending on sensory information, such as the leg switching from  
651 swing to stance once contact between the foot and the ground is detected. Organized appropriately, such  
652 interaction between reflexes, behavioral switches and environmental contacts generates stable oscillatory  
653 patterns. van der Linde (1999) showcase this principle in a biomechanically simple passive walker model  
654 with two legs actuated by spring-damper systems, where stable walking patterns emerge passively from the  
655 biomechanics, but the stiffness of the damped-spring muscles is increased at certain points in the cycle,  
656 based on sensory information, to replace the energy lost to damping back into the system. Günther and  
657 Ruder (2003) use more realistic biomechanics with hip, knee and ankle joints that are actuated by Hill-  
658 type muscles, with muscle activation determined by generic stretch reflexes. Rhythmic patterns arise from  
659 switching between different set-points for the stretch reflexes, triggered by state feedback. Another model by  
660 Geyer and Herr (2010) has similar biomechanics, but uses a selection of reflex modules to activate muscles.  
661 Each reflex module is designed to fulfill a specific function, activating a small set of muscles based on varied  
662 sensory input ranging from muscle length and velocity to forces and joint angles. Song and Geyer (2015)  
663 extended this model to 3d, and Van der Noot et al. (2018) combined it with a neural CPG.

664 The model presented here partially follows the tradition of combining reflexes with behavioral switches to  
665 generate rhythmic movement patterns. As some other models, our model shows a limited degree of flexibility  
666 in pattern this generation, in that the resulting movement speed can be varied depending on the hip extensor  
667 force (Taga, 1995b), the choice of control parameter set (Song and Geyer, 2015; Van der Noot et al., 2018), or  
668 in our case the trunk forward lean angle reference (see Section 3.3 above). Taga (1995b) shows that cadence  
669 can be modulated as well by entraining the pattern generator to an external signal. The range in which  
670 cadence can be modulated in Taga’s model is relatively limited, spanning roughly 95–120 steps per minute.  
671 More recently, Di Russo et al. (2021) showed that in a reflex model, modulation of a relatively small set of  
672 reflex parameters is sufficient to generate a wide range of walking patterns with cadences between 61–118  
673 steps per minute, speeds between 0.48 and 1.71 m/s and step lengths between 0.43 and 0.88 m. While Taga  
674 (1995b) varied cadence and speed together, Di Russo et al. (2021) showed some independence, successfully  
675 modulating step length at a constant step duration, though failing to modulate step duration at a constant  
676 step length.

677 When humans walk at a certain speed, they will generally use a certain combination of cadence and step  
678 length to achieve that speed that is largely invariant across repetitions (Inman et al., 1981). But humans  
679 are also capable of walking at different combinations of cadence and step length for a given speed (Nilsson  
680 and Thorstensson, 1987), as required e.g. when marching in-step. None of the currently existing models, our  
681 own included, is capable of this degree of flexibility. It can be argued that walking with a highly unusual  
682 combination of cadence and step length is more of a volitional action than normal walking, and requires  
683 motor planning and cortical control, which is largely absent in the existing models of human walking.

#### 684 4.4 Scope and Possible Extensions

685 We presented a neuromuscular model of human locomotion that combines flexible central control of the swing  
686 leg with fast and robust reflexive control of the stance leg. Swing leg movements are realized as goal directed  
687 reaching movements and can easily adapt to required task constraints. Stance leg control, on the other hand,  
688 is achieved by five spinal reflex modules that (1) generate compliant, spring-like leg behavior, (2) prevent knee  
689 overextension, (3) balance the trunk, (4) compensate swing leg interactions and (5) plantarflex the ankle.  
690 This purely spinal control of the stance leg has the advantage that the leg can reactively compensate for  
691 unpredictable ground reaction forces on a fast time scale, without the need for central integration of different  
692 sensory systems, which is time consuming (Peterka, 2002; Carver et al., 2006; van der Kooij and Peterka,  
693 2011). The presented model is limited such that the central controller has no direct access to the stance leg.  
694 Adaptations to desired stance leg motion patterns are only possible when reflex gain parameters are changed,  
695 requiring the re-optimization of the model parameters. Gaining high-level control over the stance leg could  
696 be achieved by superposing the existing reflex modules with additional descending control commands that  
697 realize desired gait adaptations while the functional reflex modules remain intact. The superposition of reflex  
698 modules and central control has been shown in a model of quite standing (Suzuki and Geyer, 2018) where  
699 human sway signatures could be reproduced by combining muscle reflexes and virtual model control. We are  
700 currently working on extending the model in this direction to investigate if the superposition of descending

701 and reflexive control can be applied to the stance phase of locomotion.

702 Lateral balance control has been recently found to be governed by three biomechanical control mech-  
703 anisms: The foot placement mechanism, the push-off-modulation and the ankle roll mechanism (Reimann  
704 et al., 2018a). The foot placement mechanism describes an active shift of the lateral foot placement loca-  
705 tion at footfall after a perturbation (Hof, 2008; Bruijn and van Dieën, 2018). Shifting the footfall position  
706 changes the gravitational torque acting on the body through the new stance leg during the following step.  
707 This change in gravitational torque compensates for the perturbation. Push-off modulation is a change in the  
708 ankle flexion angle of the trailing leg during double stance, starting in late single stance (Kim and Collins,  
709 2015, 2017; Reimann et al., 2018a). An increase in the ankle plantarflexion, for instance, generates a push-off  
710 force that shifts the body weight between the two stance legs, in a direction that is largely forward, but also  
711 to the side (Reimann et al., 2018b). The lateral component of the body weight shift compensates for lateral  
712 perturbations. The ankle roll mechanism is an active ankle inversion/eversion torque at the stance leg in  
713 single stance (Hof and Duysens, 2018; Reimann et al., 2018b), activating lateral ankle muscles to pull the foot  
714 segment and the rest of the body together. The foot segment rolls on the ground and shifts the CoP com-  
715 pensating for the perturbation. In the presented model, balance control solely relies on the foot-placement  
716 mechanism. This demonstrates that both push-off modulation and ankle roll mechanism are functionally  
717 not necessary for stable locomotion (Townsend, 1985). However, the two mechanisms are found to play a  
718 functional role in human walking increasing lateral stability especially in dedicated phases of the gait cycle.  
719 Simulations from simple SLIP models showed that using the ankle mechanism, when available, substantially  
720 reduces the amount of foot placement modulation required to maintain balance (Reimann et al., 2017).  
721 Adding the push off modulation and ankle roll mechanisms into the current model might improve balance  
722 in the model, leading to increased robustness against perturbations, and also lead to a better representation  
723 of human behavior by the model.

724 Human locomotion involves the coordination of multiple muscles spanning the different joints along the  
725 legs. Usually there are more muscles than biomechanical degrees of freedom, implying that there are different  
726 combinations of muscle forces that will lead to the same torques acting on the joints. Control requires  
727 selecting a particular solution out of this abundance of choice (Bernstein, 1967; Latash, 2012; Siciliano and  
728 Khatib, 2008). From a biomechanics perspective, specific muscles appear to be particularly appropriate for  
729 solving specific motor tasks. For instance, Hof (2001) showed that mono-articular muscles along the leg  
730 produce a force on the body center that is directed in the lengthwise direction along the limb, while the  
731 force from bi-articular muscles generates a significant transverse component. It is therefore biomechanically  
732 reasonable to compensate vertically acting gravitational forces with mono-articular muscles, while using bi-  
733 articular muscles when horizontal forces are required. E.g., the gastrocnemius muscle is mostly active during  
734 push-off, to propel the body mass forward, since this is one of the few situations where the combination of  
735 knee flexion and ankle plantarflexion generated by this muscle is functionally useful. Consistent with this  
736 general approach, neural evidence for the use of subgroups of muscles for balance control has been found  
737 by Sarmadi et al. (2019). Sarmadi et al. (2019) showed that sagittal trunk stabilization during standing is  
738 mainly realized with biarticular hip muscles indicating that specific muscle groups might be dedicated to  
739 specific motor tasks. The use of muscle subgroup is generally considered as muscle synergies that have been  
740 found in walking (Chvatal and Ting, 2013; Ivanenko et al., 2006, 2004) and reaching (d’Avella and Lacquaniti,  
741 2013). But how are these muscle synergies generated by the CNS? Spinal reflex circuits, as implemented  
742 in the stance leg in our model and several other models, map a sensory signal to a specific combination of  
743 muscles related to a functional motor task, e.g. stabilizing the knee. Even though multiple muscles affect  
744 one single joint, fixed reflex circuits define a unique combination of muscles that are recruited together. Such  
745 fixed reflex pathways, however, strongly restrict the ability of the limb to perform movements that are not  
746 captured by the pre-defined reflex, as discussed above. Specific co-activation patterns between muscles could  
747 also be realized by supra-spinal patterns, using specialized neural networks that learn an optimal solution  
748 to a specific task or sub-task that is encountered repeatedly with high frequency, such as swinging the leg  
749 forward during walking. In the present model we solved the mapping from joint torques to muscle forces in  
750 an ad-hoc manner using an iteration approach (see Section 2.1.5). Whether different solutions might provide  
751 functional benefits like improved stability or accuracy of voluntary movements requires further study.

## 752 5 Acknowledgements

753 RR and GS were funded by BMBF grant 01GQ1803. HR and JJJ were funded by the National Science  
754 Foundation grant CRCNS 1822568.

### 755 Author contributions

756 Conceptualization: RR, HG, JJJ, GS, HR

757 Data Curation: RR, HR

758 Formal Analysis: RR, HR

759 Funding Acquisition: JJJ, GS, HR

760 Investigation: RR, HR

761 Methodology: RR, HG, GS, RR

762 Project Administration: JJJ, GS, HR

763 Resources: JJJ, GS

764 Software: RRR, HG, RR

765 Supervision: JJJ, GS, HR

766 Validation: RR, HR

767 Visualization: RR, HR

768 Writing – Original Draft Preparation: RR, HR

769 Writing – Review & Editing: RR, HG, JJJ, GS, HR

### 770 Model sources

771 The model source files are available at <https://github.com/hendrikreimann/FlexibleWalker>.

## 772 A Parameters

| Parameter | value | unit |
|-----------|-------|------|
| $\tau_A$  | 0.01  | s    |
| $h$       | 0.65  | -    |
| $K_1$     | 5     | -    |
| $K_v$     | 0.03  | -    |

Table 2: Muscle and Reflex Parameters

| Parameter         | value | unit      |
|-------------------|-------|-----------|
| $\phi_0$          | 0.44  | rad       |
| $c_{d,early}$     | 0.47  | rad/m     |
| $c_{d,late}$      | 0.30  | rad/m     |
| $c_{v,early}$     | 0.17  | rad/(m/s) |
| $c_{v,late}$      | 0.2   | rad/(m/s) |
| $\phi_{0,lat}$    | 0     | rad       |
| $c_{d,early,lat}$ | 0.13  | rad/m     |
| $c_{d,late,lat}$  | 0.30  | rad/m     |
| $c_{v,early,lat}$ | 0.31  | rad/(m/s) |
| $c_{v,late,lat}$  | 0.34  | rad/(m/s) |

Table 3: Balance Control Parameters

| Parameter          | value   | unit  |
|--------------------|---------|-------|
| $\alpha_{hip}$     | -1.5832 | rad/m |
| $\alpha_{knee}$    | -3.6941 | rad/m |
| $\alpha_{ankle}$   | 0       | rad/m |
| $\alpha_{hiproll}$ | -1.2    | rad/m |
| $c_{hip}$          | 2.3899  | rad   |
| $c_{knee}$         | 2.3085  | rad   |
| $c_{ankle}$        | 1.25    | rad   |
| $c_{hiproll}$      | 0       | rad   |

Table 4: Obstacle Avoidance Parameters

| Parameter       | value | unit |
|-----------------|-------|------|
| $\mu_{static}$  | 0.9   | -    |
| $\mu_{dynamic}$ | 0.8   | -    |
| Stiffness       | 58860 | N/m  |

Table 5: Ground Contact Parameters

## 773 References

- 774 Ackermann, M. and van den Bogert, A. J. (2012). Predictive simulation of gait at low gravity reveals skipping  
775 as the preferred locomotion strategy. *Journal of Biomechanics*, 45(7):1293–1298.
- 776 Albert, S. T., Hadjiosif, A. M., Jang, J., Zimmnik, A. J., Soteropoulos, D. S., Baker, S. N., Churchland, M. M.,  
777 Krakauer, J. W., and Shadmehr, R. (2020). Postural control of arm and fingers through integration of  
778 movement commands. *eLife*, 9:e52507. Publisher: eLife Sciences Publications, Ltd.
- 779 Allen, J. L. and Ting, L. H. (2016). Why Is Neuromechanical Modeling of Balance and Locomotion So Hard?  
780 In Prilutsky, B. I. and Edwards, D. H., editors, *Neuromechanical Modeling of Posture and Locomotion*,  
781 pages 197–223. Springer New York, New York, NY.
- 782 Ambike, S., Zatsiorsky, V. M., and Latash, M. L. (2015). Processes underlying unintentional finger-force  
783 changes in the absence of visual feedback. *Experimental Brain Research*, 233(3):711–721.
- 784 Aruin, A. S., Forrest, W. R., and Latash, M. L. (1998). Anticipatory postural adjustments in conditions of  
785 postural instability. *Electroencephalography and Clinical Neurophysiology/Electromyography and Motor  
786 Control*, 109(4):350–359.
- 787 Balleine, B. W. (2019). The Meaning of Behavior: Discriminating Reflex and Volition in the Brain. *Neuron*,  
788 104(1):47–62.
- 789 Barton, S. L., Matthis, J. S., and Fajen, B. R. (2019). Control strategies for rapid, visually guided adjustments  
790 of the foot during continuous walking. *Experimental Brain Research*, 237(7):1673–1690.
- 791 Bauby, C. E. and Kuo, A. D. (2000). Active control of lateral balance in human walking. *Journal of  
792 Biomechanics*, 33(11):1433–1440.
- 793 Bernstein, N. (1967). *The co-ordination and regulation of movements*. Pergamon Press, Oxford.
- 794 Bouisset, S. and Zattara, M. (1987). Biomechanical study of the programming of anticipatory postural  
795 adjustments associated with voluntary movement. *Journal of Biomechanics*, 20(8):735–742.
- 796 Browning, R. C., Baker, E. A., Herron, J. A., and Kram, R. (2006). Effects of obesity and sex on the energetic  
797 cost and preferred speed of walking. *Journal of Applied Physiology*, 100(2):390–398. Publisher: American  
798 Physiological Society.
- 799 Bruijn, S. M. and van Dieën, J. H. (2018). Control of human gait stability through foot placement. *Journal  
800 of the Royal Society Interface*, 15(143). ISBN: 0000000302.
- 801 Buhrmann, T. and Di Paolo, E. A. (2014). Spinal circuits can accommodate interaction torques during  
802 multijoint limb movements. *Frontiers in Computational Neuroscience*, 8.
- 803 Carver, S., Kiemel, T., and Jeka, J. J. (2006). Modeling the dynamics of sensory reweighting. *Biological  
804 cybernetics*, 95(2):123–34.
- 805 Chou, L.-S., Kaufman, K. R., Brey, R. H., and Draganich, L. F. (2001). Motion of the whole body’s center  
806 of mass when stepping over obstacles of different heights. *Gait & Posture*, 13(1):17–26.
- 807 Churchland, M. M., Cunningham, J. P., Kaufman, M. T., Foster, J. D., Nuyujukian, P., Ryu, S. I., and  
808 Shenoy, K. V. (2012). Neural population dynamics during reaching. *Nature*, 487(7405):51–6. Publisher:  
809 Nature Publishing Group.
- 810 Chvatal, S. A. P. D. and Ting, L. H. P. D. (2013). Common muscle synergies for balance and walking.  
811 *Frontiers in Computational Neuroscience*, 7. Publisher: Frontiers.
- 812 Clark, D. J. (2015). Automaticity of walking: functional significance, mechanisms, measurement and reha-  
813 bilitation strategies. *Frontiers in Human Neuroscience*, 9.

- 814 Darling, W. G., Pizzimenti, M. A., and Morecraft, R. J. (2011). Functional recovery following motor  
815 cortex lesions in non-human primates: experimental implications for human stroke patients. *J. Integr.*  
816 *Neurosci.*, 10:353–384.
- 817 d’Avella, A. and Lacquaniti, F. (2013). Control of reaching movements by muscle synergy combinations.  
818 *Frontiers in Computational Neuroscience*, 7.
- 819 De Groote, F. and Falisse, A. (2021). Perspective on musculoskeletal modelling and predictive simulations  
820 of human movement to assess the neuromechanics of gait. *Proceedings of the Royal Society B: Biological*  
821 *Sciences*, 288(1946):20202432.
- 822 Dean, G. A. (1965). An Analysis of the Energy Expenditure in Level and Grade Walking. *Ergonomics*,  
823 8(1):31–47.
- 824 Di Russo, A., Stanev, D., Armand, S., and Ijspeert, A. (2021). Sensory modulation of gait character-  
825 istics in human locomotion: A neuromusculoskeletal modeling study. *PLoS Computational Biology*,  
826 17(5):e1008594.
- 827 Dolan, R. and Dayan, P. (2013). Goals and Habits in the Brain. *Neuron*, 80(2):312–325.
- 828 Donelan, J. M., Kram, R., and Kuo, A. D. (2001). Mechanical and metabolic determinants of the preferred  
829 step width in human walking. *Proceedings of the Royal Society of London. Series B: Biological Sciences*,  
830 268(1480):1985–1992.
- 831 Donelan, J. M., Shipman, D. W., Kram, R., and Kuo, A. D. (2004). Mechanical and metabolic requirements  
832 for active lateral stabilization in human walking. *Journal of Biomechanics*, 37(6):827–835.
- 833 Feldman, A. G. (1986). Once More on the Equilibrium-Point Hypothesis ( $\lambda$  Model) for Mo-  
834 tor Control. *Journal of Motor Behavior*, 18(1):17–54. Publisher: Routledge eprint:  
835 <https://doi.org/10.1080/00222895.1986.10735369>.
- 836 Fukuchi, C. A., Fukuchi, R. K., and Duarte, M. (2018). A public dataset of overground and treadmill walking  
837 kinematics and kinetics in healthy individuals. *PeerJ*, 6:e4640.
- 838 Geijtenbeek, T., van de Panne, M., and van der Stappen, A. F. (2013). Flexible muscle-based locomotion  
839 for bipedal creatures. *ACM Transactions on Graphics*, 32(6):1–11.
- 840 Georgopoulos, A. P. and Grillner, S. (1989). Visuomotor coordination in reaching and locomotion. *Science*  
841 (*New York, N.Y.*), 245(4923):1209–1210. ISBN: 0036-8075 (Print)\r0036-8075 (Linking).
- 842 Geyer, H. and Herr, H. (2010). A Muscle-reflex model that encodes principles of legged mechanics produces  
843 human walking dynamics and muscle activities. *IEEE Transactions on Neural Systems and Rehabilita-*  
844 *tion Engineering*, 18(3):263–273. ISBN: 15344320.
- 845 Gharbawie, O. A. and Whishaw, I. Q. (2006). Parallel stages of learning and recovery of skilled reaching  
846 after motor cortex stroke: “Oppositions” organize normal and compensatory movements. *Behavioural*  
847 *Brain Research*, 175(2):249–262.
- 848 Gribble, P. L., Ostry, D. J., Sanguineti, V., and Laboissière, R. (1998). Are complex control signals required  
849 for human arm movement? *Journal of Neurophysiology*, 79(3):1409–24.
- 850 Guertin, P. A. (2013). Central Pattern Generator for Locomotion: Anatomical, Physiological, and Patho-  
851 physiological Considerations. *Frontiers in Neurology*, 3.
- 852 Günther, M. and Ruder, H. (2003). Synthesis of two-dimensional human walking: A test of the  $\lambda$ -model.  
853 *Biological Cybernetics*, 89(2):89–106.
- 854 Hansen, N. (2006). The CMA Evolution Strategy: A Comparing Review. In Lozano, J. A., Larrañaga,  
855 P., Inza, I., and Bengoetxea, E., editors, *Towards a New Evolutionary Computation: Advances in the*  
856 *Estimation of Distribution Algorithms*, pages 75–102. Springer Berlin Heidelberg, Berlin, Heidelberg.



- 857 Hodgson, A. and Hogan, N. (2000). A model-independent definition of attractor behavior applicable to  
858 interactive tasks. *IEEE Transactions on Systems, Man, and Cybernetics, Part C (Applications and*  
859 *Reviews)*, 30(1):105–118. Conference Name: IEEE Transactions on Systems, Man, and Cybernetics,  
860 Part C (Applications and Reviews).
- 861 Hof, A. (2001). The force resulting from the action of mono- and biarticular muscles in a limb. *Journal of*  
862 *Biomechanics*, 34(8):1085–1089.
- 863 Hof, A. and Duysens, J. (2018). Responses of human ankle muscles to mediolateral balance perturbations  
864 during walking. *Human Movement Science*, 57:69–82.
- 865 Hof, A. L. (2008). The ‘extrapolated center of mass’ concept suggests a simple control of balance in walking.  
866 *Human Movement Science*, 27(1):112–25.
- 867 Hogan, N. (1984). An organizing principle for a class of voluntary movements. *Journal of Neuroscience*,  
868 4(11):2745–2754.
- 869 Hunter, L., Hendrix, E., and Dean, J. (2010). The cost of walking downhill: Is the preferred gait energetically  
870 optimal? *Journal of Biomechanics*, 43(10):1910–1915.
- 871 Inman, V., Ralston, H., Todd, F., and Lieberman, J. (1981). *Human Walking*. Williams & Wilkins.
- 872 Ivanenko, Y. P., Poppele, R. E., and Lacquaniti, F. (2004). Five basic muscle activation patterns account  
873 for muscle activity during human locomotion. *The Journal of Physiology*, 556(1):267–282. eprint:  
874 <https://physoc.onlinelibrary.wiley.com/doi/pdf/10.1113/jphysiol.2003.057174>.
- 875 Ivanenko, Y. P., Poppele, R. E., and Lacquaniti, F. (2006). Spinal Cord Maps of Spatiotemporal Alpha-  
876 Motoneuron Activation in Humans Walking at Different Speeds. *Journal of Neurophysiology*, 95(2):602–  
877 618. Publisher: American Physiological Society.
- 878 Jankovic, J. (2008). Parkinson’s disease: clinical features and diagnosis. *Journal of Neurology, Neurosurgery*  
879 *& Psychiatry*, 79(4):368–376.
- 880 Kalaska, J. F., Scott, S. H., Cisek, P., and Sergio, L. E. (1997). Cortical control of reaching movements.  
881 *Current Opinion in Neurobiology*, 7(6):849–859.
- 882 Kawahara, K. and Mori, S. (1982). A two compartment model of the stepping generator: Analysis of the  
883 roles of a stage-setter and a rhythm generator. *Biological Cybernetics*, 43:225–230.
- 884 Kawai, R., Markman, T., Poddar, R., Ko, R., Fantana, A., Dhawale, A., Kampff, A., and Ölveczky, B. (2015).  
885 Motor Cortex Is Required for Learning but Not for Executing a Motor Skill. *Neuron*, 86(3):800–812.
- 886 Kiehn, O. (2016). Decoding the organization of spinal circuits that control locomotion. *Nature Reviews*  
887 *Neuroscience*, 17(4):224–238.
- 888 Kim, M. and Collins, S. H. (2015). Once-per-step control of ankle-foot prosthesis push-off work reduces effort  
889 associated with balance during walking. *Journal of Neuroengineering and Rehabilitation*, 12(1):43. ISBN:  
890 1743-0003.
- 891 Kim, M. and Collins, S. H. (2017). Once-Per-Step Control of Ankle Push-Off Work Improves Balance in a  
892 Three-Dimensional Simulation of Bipedal Walking. *IEEE Transactions on Robotics*, 33(2):406–418.
- 893 Kirtley, C., Whittle, M. W., and Jefferson, R. J. (1985). Influence of walking speed on gait parameters.  
894 *Journal of Biomedical Engineering*, 7(4):282–288.
- 895 Kistemaker, D. A., Van Soest, A. K. J., and Bobbert, M. F. (2007). Equilibrium point control cannot be  
896 refuted by experimental reconstruction of equilibrium point trajectories. *Journal of Neurophysiology*,  
897 98(3):1075–82.

- 898 Kung, S. M., Fink, P. W., Legg, S. J., Ali, A., and Shultz, S. P. (2018). What factors determine the preferred  
899 gait transition speed in humans? A review of the triggering mechanisms. *Human Movement Science*,  
900 57:1–12.
- 901 Lanciego, J. L., Luquin, N., and Obeso, J. A. (2012). Functional Neuroanatomy of the Basal Ganglia. *Cold  
902 Spring Harbor Perspectives in Medicine*, 2(12):a009621–a009621.
- 903 Latash, M. L. (2008). *Neurophysiological basis of movement*. Human Kinetics. Series Title: Neurophysio-  
904 logical Basis of Movement.
- 905 Latash, M. L. (2012). The Bliss of Motor Abundance. *Experimental Brain Research*, 217(1):1–5. arXiv:  
906 NIHMS150003 ISBN: 0014-4819.
- 907 Latash, M. L. and Gottlieb, G. L. (1991). Reconstruction of shifting elbow joint compliant characteristics  
908 during fast and slow movements. *Neuroscience*, 43(2):697–712.
- 909 Lawson, C. and Hanson, R. (1995). *Solving Least Squares Problems*. Classics in Applied Mathematics.  
910 Society for Industrial and Applied Mathematics.
- 911 Levine, D., Richards, J., and Whittle, M. (2012). *Whittle’s Gait Analysis - E-Book*. Elsevier Health Sciences.
- 912 Mantziaris, C., Bockemühl, T., and Büschges, A. (2020). Central pattern generating networks in insect  
913 locomotion. *Developmental Neurobiology*, 80(1-2):16–30.
- 914 Matsuoka, K. (1985). Sustained oscillations generated by mutually inhibiting neurons with adaptation.  
915 *Biological Cybernetics*, 52:367–376.
- 916 Matthis, J. S. and Fajen, B. R. (2014). Visual control of foot placement when walking over complex terrain.  
917 *Journal of Experimental Psychology: Human Perception and Performance*, 40(1):106–115.
- 918 Miller, S. and Scott, P. (1977). The spinal locomotor generator. *Experimental Brain Research*, 30-30(2-3).
- 919 Moissenet, F., Leboeuf, F., and Armand, S. (2019). Lower limb sagittal gait kinematics can be predicted  
920 based on walking speed, gender, age and BMI. *Scientific Reports*, 9(1):9510. Bandiera\_abtest: a  
921 Cc\_license\_type: cc\_by Cg\_type: Nature Research Journals Number: 1 Primary\_atype: Research Pub-  
922 lisher: Nature Publishing Group Subject\_term: Biomedical engineering;Computational models Sub-  
923 ject\_term\_id: biomedical-engineering;computational-models.
- 924 Mowbray, R., Gottwald, J. M., Zhao, M., Atkinson, A. P., and Cowie, D. (2019). The development of visually  
925 guided stepping. *Experimental Brain Research*, 237(11):2875–2883.
- 926 Murray, R. M., Li, Z., and Sastry, S. S. (1994). *A Mathematical Introduction to Robotic Manipulation*. CRC  
927 Press INC.
- 928 Mutha, P. K. (2017). Reflex Circuits and Their Modulation in Motor Control: A Historical Perspective and  
929 Current View. *Journal of the Indian Institute of Science*, 97(4):555–565.
- 930 Nielsen, J. B. (2003). How we Walk: Central Control of Muscle Activity during Human Walking. *The  
931 Neuroscientist*, 9(3):195–204.
- 932 Nilsson, J. and Thorstensson, A. (1987). Adaptability in frequency and amplitude of leg movements during  
933 human locomotion at different speeds. *Acta Physiologica Scandinavica*, 129(1):107–114.
- 934 Ong, C. F., Geijtenbeek, T., Hicks, J. L., and Delp, S. L. (2019). Predicting gait adaptations due to ankle  
935 plantarflexor muscle weakness and contracture using physics-based musculoskeletal simulations. *PLOS  
936 Computational Biology*, 15(10):e1006993.
- 937 Osoba, M. Y., Rao, A. K., Agrawal, S. K., and Lalwani, A. K. (2019). Balance and gait in the elderly: A  
938 contemporary review. *Laryngoscope investigative otolaryngology*, 4(1):143–153. Publisher: Wiley Online  
939 Library.

- 940 Patla, A. E., Prentice, S. D., Robinson, C., and Neufeld, J. (1991). Visual control of locomotion: Strategies for  
941 changing direction and for going over obstacles. *Journal of Experimental Psychology: Human Perception*  
942 *and Performance*, 17(3):603–634.
- 943 Peterka, R. J. (2002). Sensorimotor integration in human postural control. *Journal of Neurophysiology*,  
944 88(3):1097–1118. ISBN: 0022-3077 (Print)\n0022-3077 (Linking).
- 945 Peterson, D. S. and Horak, F. B. (2016). Neural Control of Walking in People with Parkinsonism. *Physiology*,  
946 31(2):95–107.
- 947 Pijnappels, M., Reeves, N. D., Maganaris, C. N., and van Dieën, J. H. (2008). Tripping without falling;  
948 lower limb strength, a limitation for balance recovery and a target for training in the elderly. *Journal*  
949 *of Electromyography and Kinesiology*, 18(2):188–196.
- 950 Prentice, S. D., Hasler, E. N., Groves, J. J., and Frank, J. S. (2004). Locomotor adaptations for changes in  
951 the slope of the walking surface. *Gait & Posture*, 20(3):255–265.
- 952 Ralston, H. J. (1958). Energy-speed relation and optimal speed during level walking. *Internationale*  
953 *Zeitschrift für angewandte Physiologie einschließlich Arbeitsphysiologie*, 17(4):277–283.
- 954 Reimann, H., Fettrow, T., and Jeka, J. J. (2018a). Strategies for the Control of Balance During Locomotion.  
955 *Kinesiology Review*, 7(1):18–25.
- 956 Reimann, H., Fettrow, T., Thompson, E. D., Agada, P., McFadyen, B. J., and Jeka, J. J. (2017). Comple-  
957 mentary mechanisms for upright balance during walking. *PLoS ONE*, pages 1–16.
- 958 Reimann, H., Fettrow, T., Thompson, E. D., and Jeka, J. J. (2018b). Neural Control of Balance During  
959 Walking. *Frontiers in Physiology*, 9(September):1271.
- 960 Reimann, H., Ramadan, R., Fettrow, T., Hafer, J. F., Geyer, H., and Jeka, J. J. (2020). Interactions  
961 Between Different Age-Related Factors Affecting Balance Control in Walking. *Frontiers in Sports and*  
962 *Active Living*, 2:94.
- 963 Reimann, H. and Schöner, G. (2017). A multi-joint model of quiet, upright stance accounts for the “un-  
964 controlled manifold” structure of joint variance. *Biological Cybernetics*, 111(5-6):389–403. Publisher:  
965 Springer Berlin Heidelberg.
- 966 Reynolds, R. F. and Day, B. L. (2005a). Rapid visuo-motor processes drive the leg regardless of balance  
967 constraints. *Current Biology*, 15(2):R48–R49.
- 968 Reynolds, R. F. and Day, B. L. (2005b). Visual guidance of the human foot during a step: Visually guided  
969 stepping. *The Journal of Physiology*, 569(2):677–684.
- 970 Sabes, P. (2000). The planning and control of reaching movements. *Current Opinion in Neurobiology*,  
971 10(6):740–746.
- 972 Sarmadi, A., Schumacher, C., Seyfarth, A., and Sharbafi, M. A. (2019). Concerted Control of Stance and  
973 Balance Locomotor Subfunctions—Leg Force as a Conductor. *IEEE Transactions on Medical Robotics*  
974 *and Bionics*, 1(1):49–57. Conference Name: IEEE Transactions on Medical Robotics and Bionics.
- 975 Schwartz, A. B. and Moran, D. W. (1999). Motor cortical activity during drawing movements: population  
976 representation during lemniscate tracing. *Journal of Neurophysiology*, 82(5):2705–18.
- 977 Scott, S. H. (2004). Optimal feedback control and the neural basis of volitional motor control. *Nature*  
978 *reviews. Neuroscience*, 5(7):532–46.
- 979 Sharbafi, M. A. and Seyfarth, A. (2017). *Bioinspired Legged Locomotion: Models, Concepts, Control and*  
980 *Applications*. Butterworth-Heinemann. Google-Books-ID: 3gVQCwAAQBAJ.
- 981 Siciliano, B. and Khatib, O. (2008). *Springer Handbook of Robotics*. Springer. Series Title: Gale virtual  
982 reference library.

- 983 Smid, K. and den Otter, A. (2013). Why you need to look where you step for precise foot placement: The  
984 effects of gaze eccentricity on stepping errors. *Gait & Posture*, 38(2):242–246.
- 985 Song, S. and Geyer, H. (2015). A neural circuitry that emphasizes spinal feedback generates diverse be-  
986 haviours of human locomotion. *Journal of Physiology*, 593:3493–3511. ISBN: 0022-3751.
- 987 Steele, K. M., van der Krogt, M. M., Schwartz, M. H., and Delp, S. L. (2012). How much muscle strength  
988 is required to walk in a crouch gait? *Journal of Biomechanics*, 45(15):2564–2569.
- 989 Stein, R. B. (1991). Reflex Modulation During Locomotion: Functional Significance§§The original work  
990 reviewed here was done with Dr. J. Yang, Dr. M. Edamura and Dr. C. Capaday. Support for the  
991 research was provided by the Medical Research Council of Canada. Much of this material was presented  
992 in Tokyo at a conference on the Neurobiology of Human Locomotion, the proceedings of which are  
993 being published by Japanese Scientific Societies Press. In Patla, A. E., editor, *Advances in Psychology*,  
994 volume 78 of *Adaptability of Human Gait*, pages 21–36. North-Holland.
- 995 Stollenmaier, K., Ilg, W., and Haeufle, D. F. B. (2020). Predicting Perturbed Human Arm Movements in a  
996 Neuro-Musculoskeletal Model to Investigate the Muscular Force Response. *Frontiers in Bioengineering  
997 and Biotechnology*, 8. Publisher: Frontiers.
- 998 Summerside, E. M., Kram, R., and Ahmed, A. A. (2018). Contributions of metabolic and temporal costs  
999 to human gait selection. *Journal of The Royal Society Interface*, 15(143):20180197. Publisher: Royal  
1000 Society.
- 1001 Sutherland, D. H. and Davids, J. R. (1993). Common gait abnormalities of the knee in cerebral palsy. *Clin  
1002 Orthop Relat Res.*, 288:139–47.
- 1003 Suzuki, Y. and Geyer, H. (2018). A simple bipedal model for studying control of gait termination. *Bioin-  
1004 spiration & Biomimetics*, 13(3):036005.
- 1005 Taga, G. (1995a). A model of the neuro-musculo-skeletal system for human locomotion. I. Emergence of  
1006 basic gait. *Biological Cybernetics*, 111:97–111.
- 1007 Taga, G. (1995b). A model of the neuro-musculo-skeletal system for human locomotion. II. Real-time  
1008 adaptability under various constraints. *Biological Cybernetics*, 73:113–121.
- 1009 Taga, G. (1998). A model of the neuro-musculo-skeletal system for anticipatory adjustment of human  
1010 locomotion during obstacle avoidance. *Biological cybernetics*, 78(1):9–17. ISBN: 0340-1200.
- 1011 Townsend, M. A. (1985). Biped gait stabilization via foot placement. *Journal of Biomechanics*, 18(1):21–38.  
1012 ISBN: 0021-9290.
- 1013 van der Kooij, H. and Peterka, R. J. (2011). Non-linear stimulus-response behavior of the human stance  
1014 control system is predicted by optimization of a system with sensory and motor noise. *Journal of  
1015 Computational Neuroscience*, 30(3):759–778.
- 1016 van der Linde, R. Q. (1999). Passive bipedal walking with phasic muscle contraction. *Biological Cybernetics*,  
1017 81(3):227–237.
- 1018 Van der Noot, N., Ijspeert, A. J., and Ronsse, R. (2018). Bio-inspired controller achieving forward speed  
1019 modulation with a 3D bipedal walker. *International Journal of Robotics Research*, 37(1):168–196.
- 1020 Voloshina, A. S., Kuo, A. D., Daley, M. A., and Ferris, D. P. (2013). Biomechanics and energetics of walking  
1021 on uneven terrain. *Journal of Experimental Biology*, 216(21):3963–3970.
- 1022 Wang, J. M., Hamner, S. R., Delp, S. L., and Koltun, V. (2012). Optimizing locomotion controllers using  
1023 biologically-based actuators and objectives. *ACM Transactions on Graphics*, 31(4):25:1–25:11.
- 1024 Wang, Y. and Srinivasan, M. (2014). Stepping in the direction of the fall: the next foot placement can be  
1025 predicted from current upper body state in steady-state walking. *Biology Letters*, 10:20140405.

- 1026 Warabi, T., Furuyama, H., Sugai, E., Kato, M., and Yanagisawa, N. (2018). Gait bradykinesia in Parkinson's  
1027 disease: a change in the motor program which controls the synergy of gait. *Experimental Brain Research*,  
1028 236(1):43–57.
- 1029 Whelan, P. (1996). Control of Locomotion in the Decerebrate Cat. *Progress in Neurobiology*, 49(5):481–515.
- 1030 Whishaw, I. Q. (2000). Loss of the innate cortical engram for action patterns used in skilled reaching and the  
1031 development of behavioral compensation following motor cortex lesions in the rat. *Neuropharmacology*,  
1032 39(5):788–805.
- 1033 Woollacott, M., Bonnet, M., and Yabe, K. (1984). Preparatory process for anticipatory postural adjustments:  
1034 Modulation of leg muscles reflex pathways during preparation for arm movements in standing man.  
1035 *Experimental Brain Research*, 55(2).
- 1036 Yin, K., Loken, K., and Panne, M. V. D. (2007). SIMBICON: simple biped locomotion control. In *ACM*  
1037 *SIGGRAPH 2007 papers*, volume ab, page 105, San Diego, California.
- 1038 Zehr, E. P. and Stein, R. B. (1999). What functions do reflexes serve during human locomotion? *Progress*  
1039 *in Neurobiology*, 58(2):185–205.
- 1040 Zhang, Y., Smeets, J. B. J., Brenner, E., Verschueren, S., and Duysens, J. (2020). Fast responses to stepping-  
1041 target displacements when walking. *The Journal of Physiology*, 598(10):1987–2000.
